# Supplementary material for: Evaluation of the Marine Bacterial Population in the Great Bitter Lake, Egypt, as a Source of Antimicrobial Secondary Metabolites
Source: MDPI journal article supplement (doi:10.3390/fermentation8070309), 2022-06-30

# Supplementary Material

**LC-Mass Spectra**

# LC-Mass Spectra

## Isolate SS1

1: MS ES+ :BPI

2.6e+008

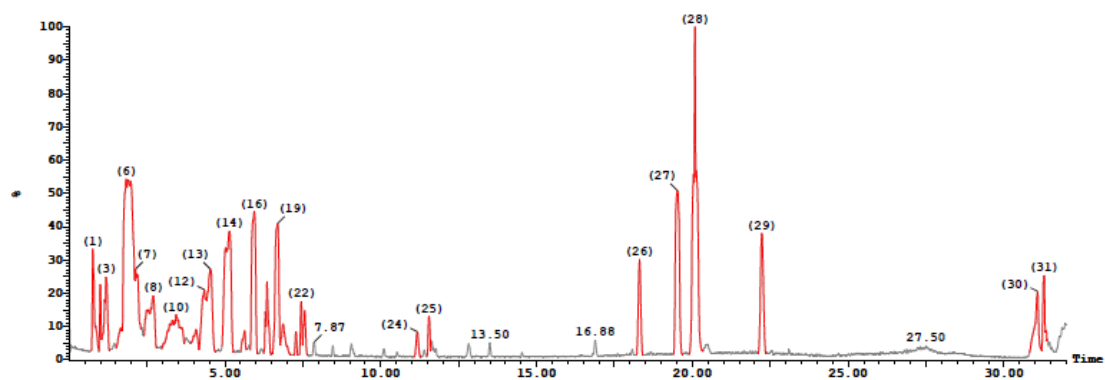

Peak ID Time Error PPM  
1 0.78  
(Time: 0.76)

1:MS ES+  
4.0e+007

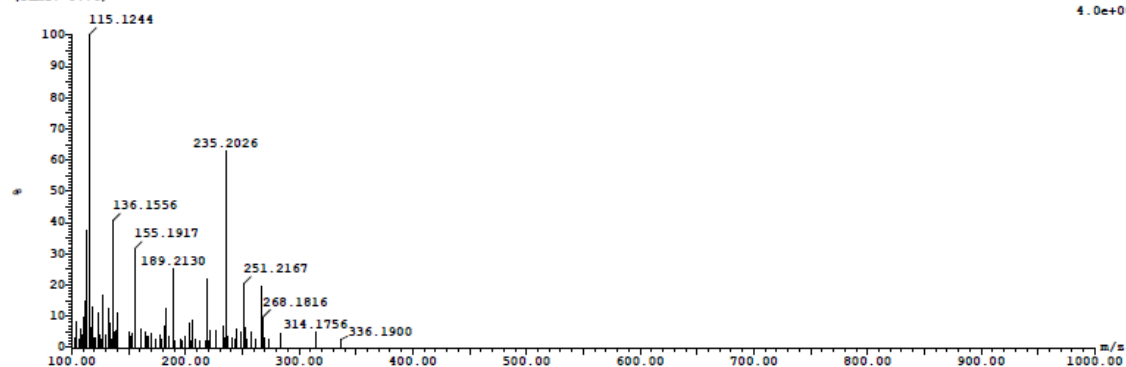

Peak ID Time Error PPM  
2 1.00  
(Time: 1.00)

1:MS ES+  
2.5e+007

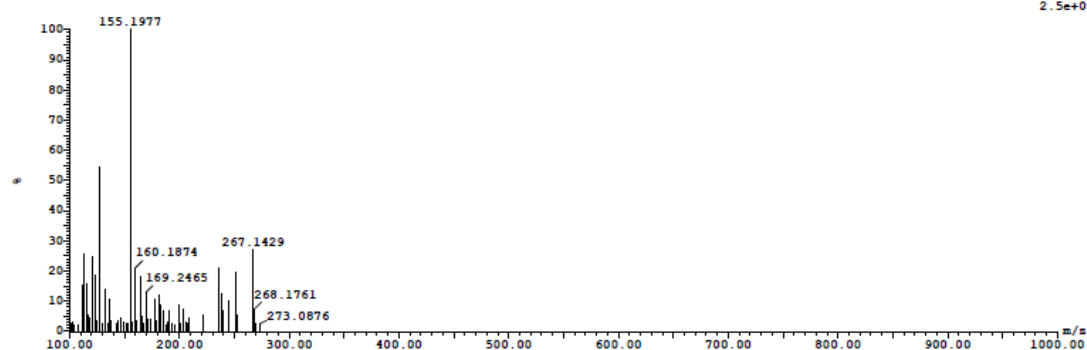

Peak ID Time Error PPM  
3 1.18

1:MS ES+  
5.1e+007

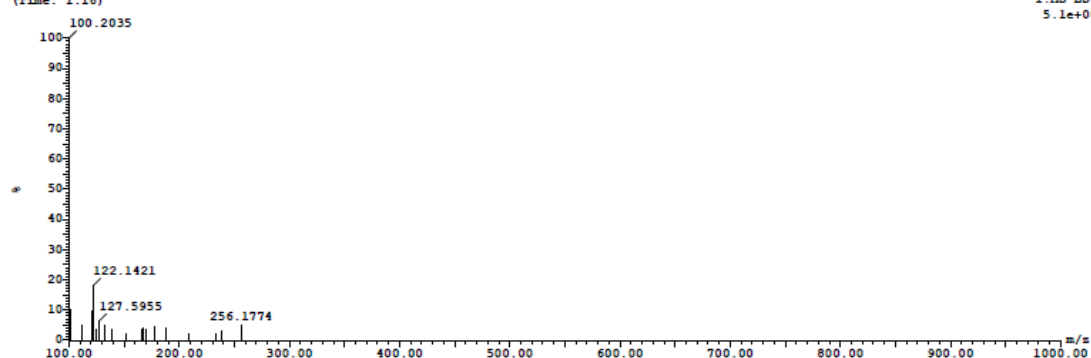

Peak ID Time Error PPM  
4 1.64

1:MS ES+  
2.1e+007

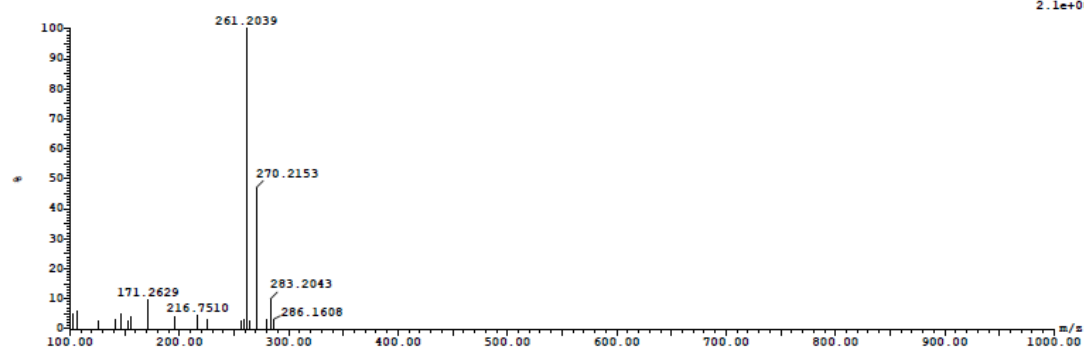

Peak ID Time Error PPM  
5 1.69

1:MS ES+  
2.3e+007

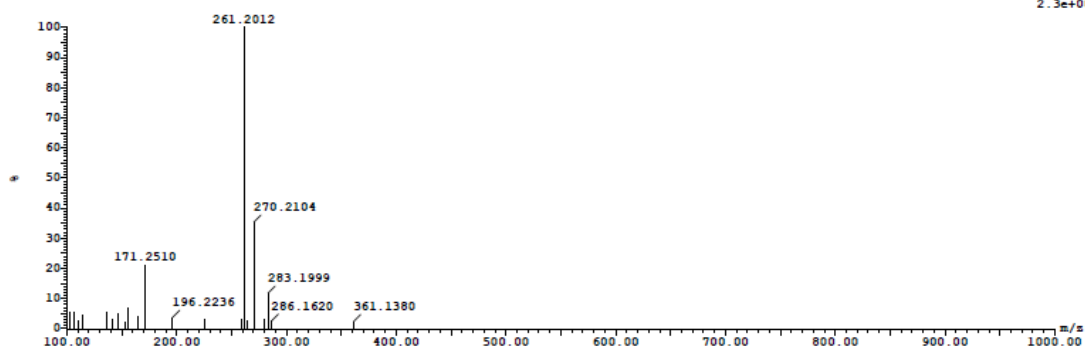

Peak ID Time Error PPM  
6 1.83

1:MS ES+  
1.3e+008

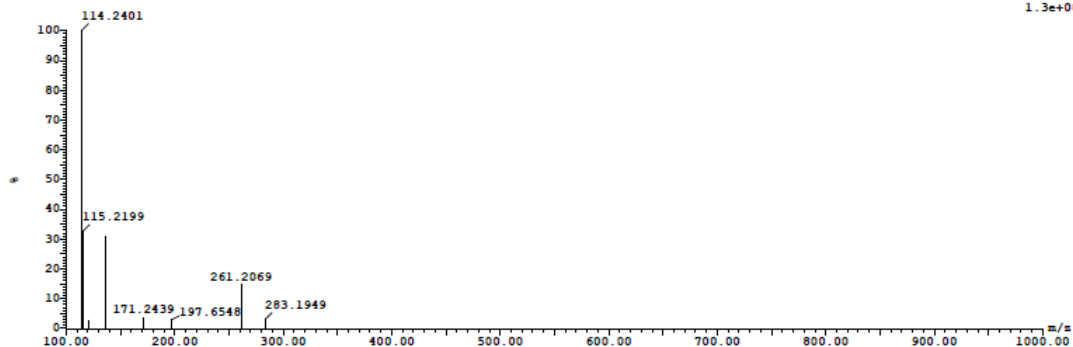

Peak ID Time Error PPM  
7 2.13  
(Time: 2.13)

1:MS ES+  
5.7e+007

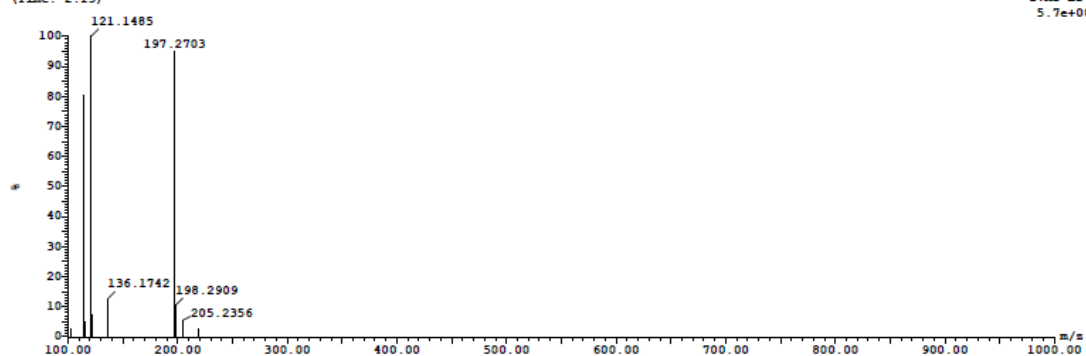

Peak ID Time Error PPM  
8 2.70  
(Time: 2.70)

1:MS ES+  
4.2e+007

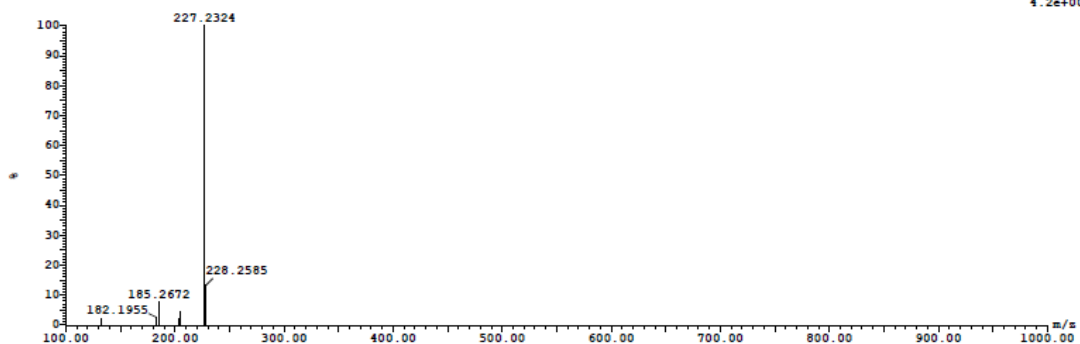

Peak ID Time Error PPM  
9 3.31  
(Time: 3.31)

1:MS ES+  
2.7e+007

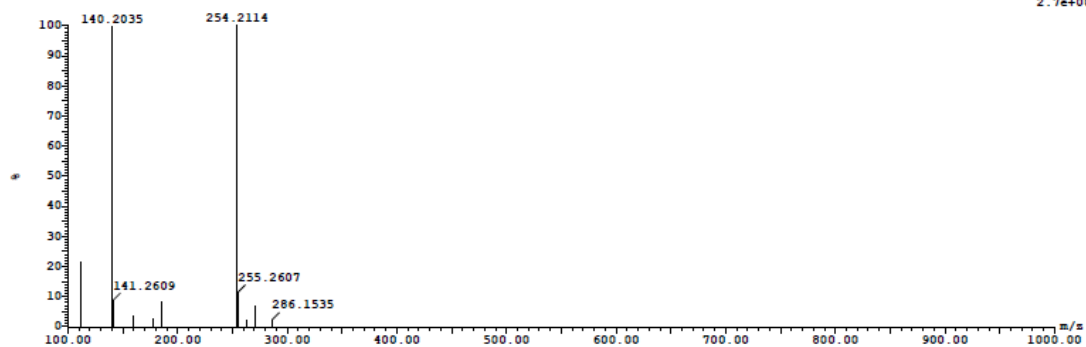

Peak ID Time Error PPM  
10 3.43

(Time: 3.43)

1:MS ES+  
2.7e+007

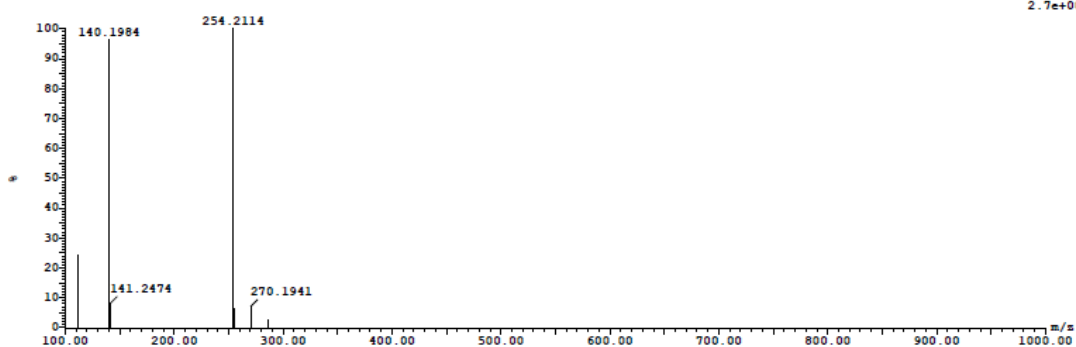

Peak ID Time Error PPM  
11 4.08

(Time: 4.08)

1:MS ES+  
2.0e+007

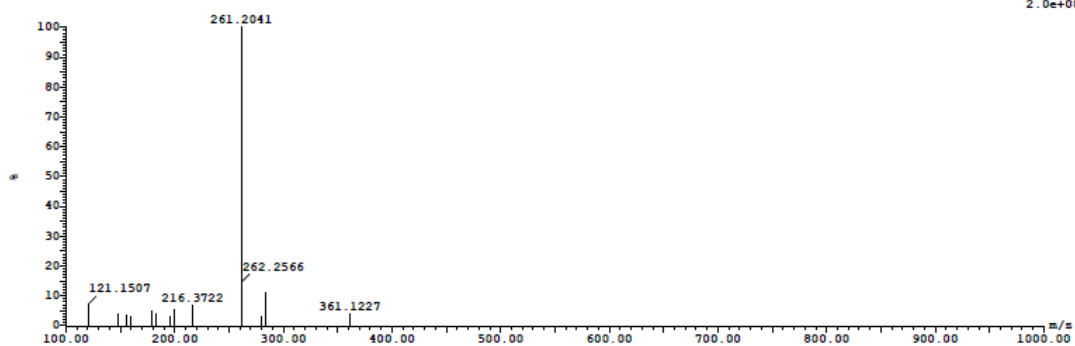

Peak ID Time Error PPM  
12 4.34

(Time: 4.34)

1:MS ES+  
3.7e+007

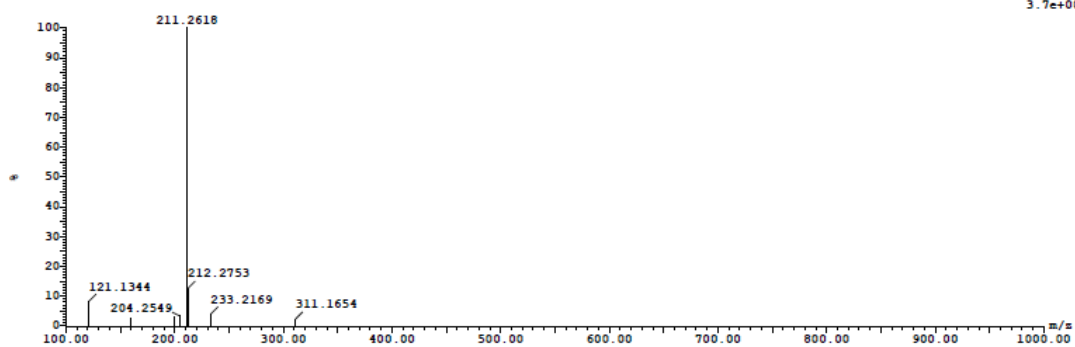

Peak ID Time Error PPM  
13 4.54  
(Time: 4.54)

1:MS ES+  
4.9e+007

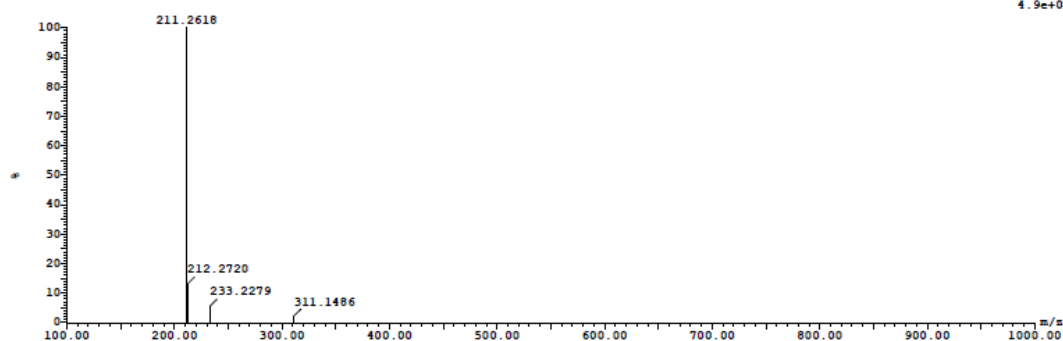

Peak ID Time Error PPM  
14 5.14  
(Time: 5.14)

1:MS ES+  
6.9e+007

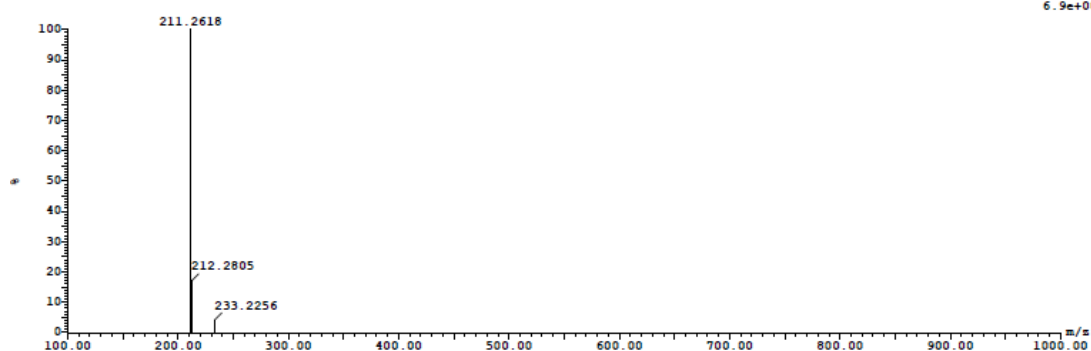

Peak ID Time Error PPM  
15 5.63  
(Time: 5.63)

1:MS ES+  
1.6e+007

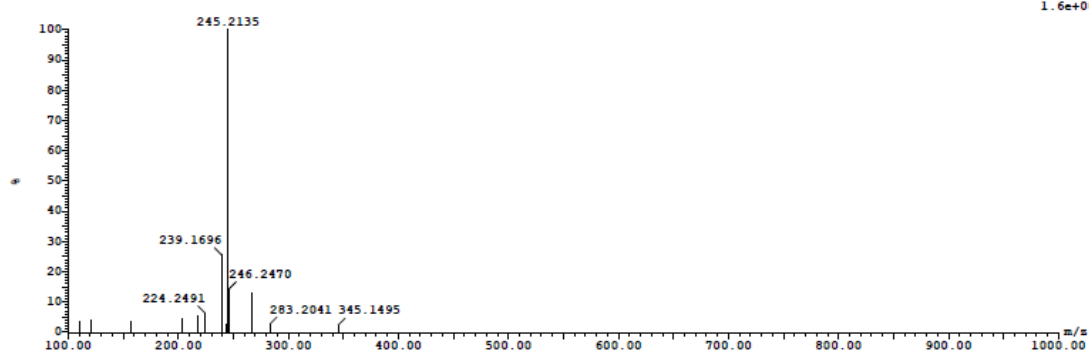

Peak ID Time Error PPM  
16 5.94  
(Time: 5.94)

1:MS ES+  
1.0e+008

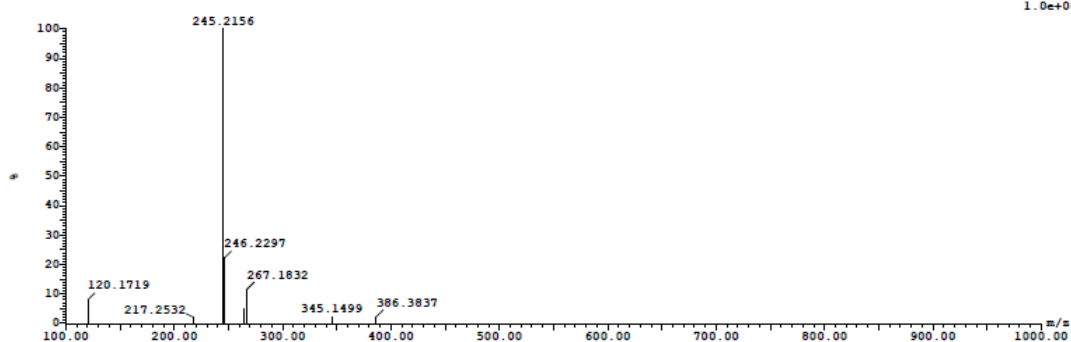

Peak ID Time Error PPM  
17 6.30  
(Time: 6.30)

1:MS ES+  
2.9e+007

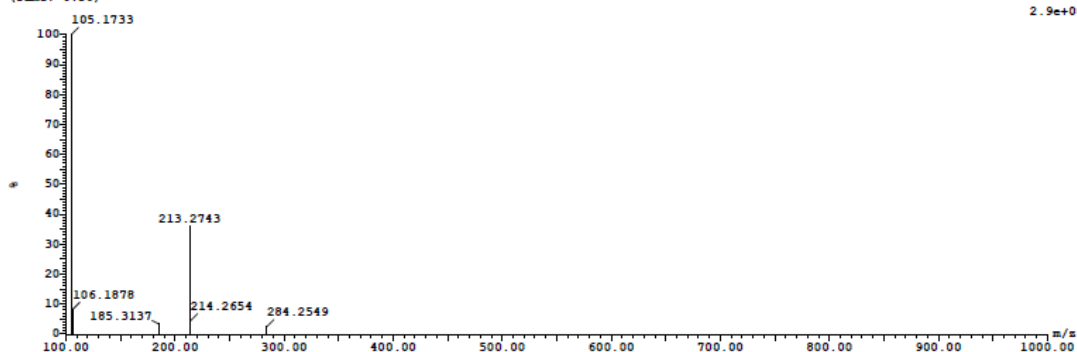

Peak ID Time Error PPM  
18 6.35  
(Time: 6.35)

1:MS ES+  
3.9e+007

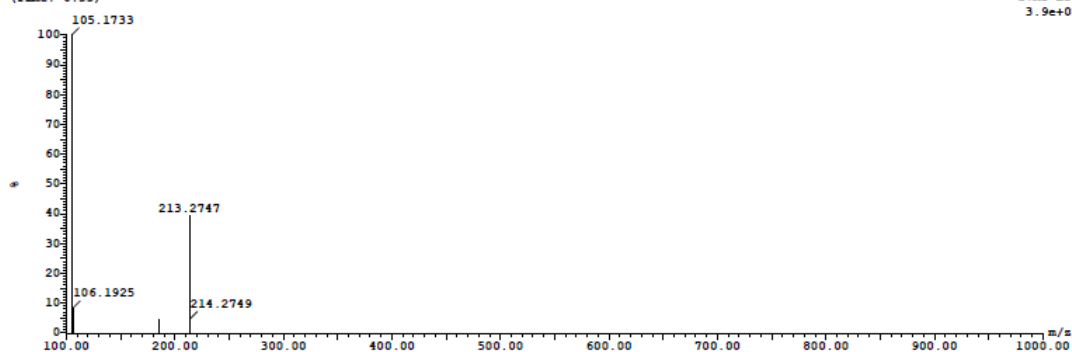

Peak ID Time Error PPM  
19 6.68  
(Time: 6.68)

1:MS ES+  
9.5e+007

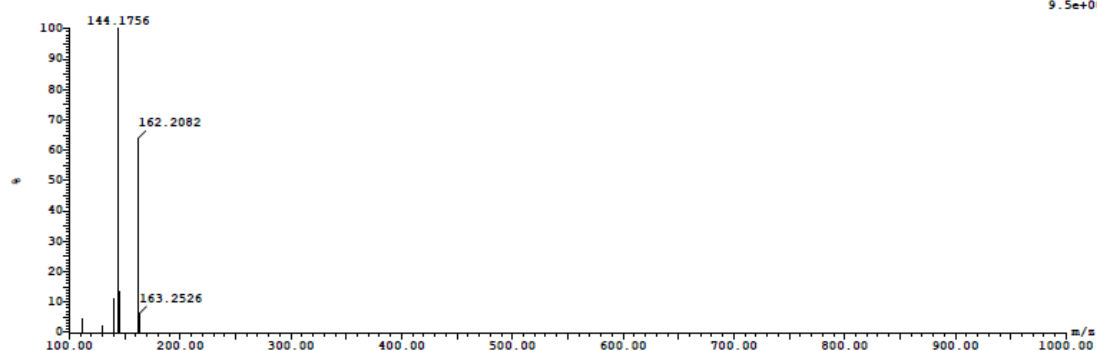

Peak ID Time Error PPM  
20 6.86  
(Time: 6.86)

1:MS ES+  
2.3e+007

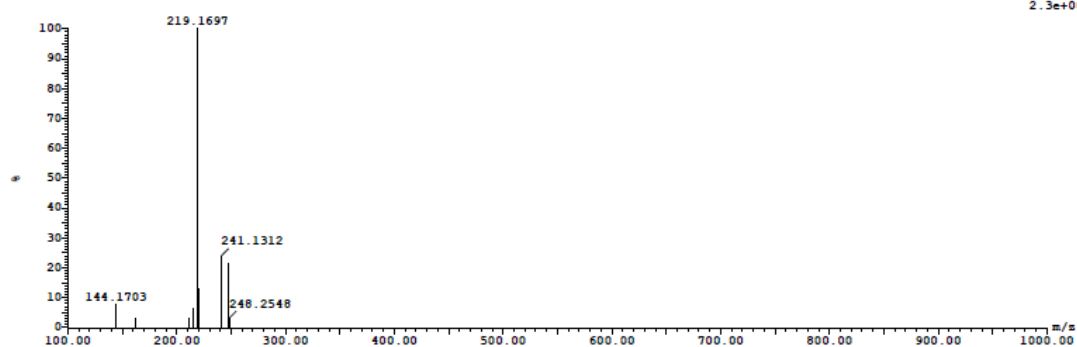

Peak ID Time Error PPM  
21 7.28  
(Time: 7.28)

1:MS ES+  
1.2e+007

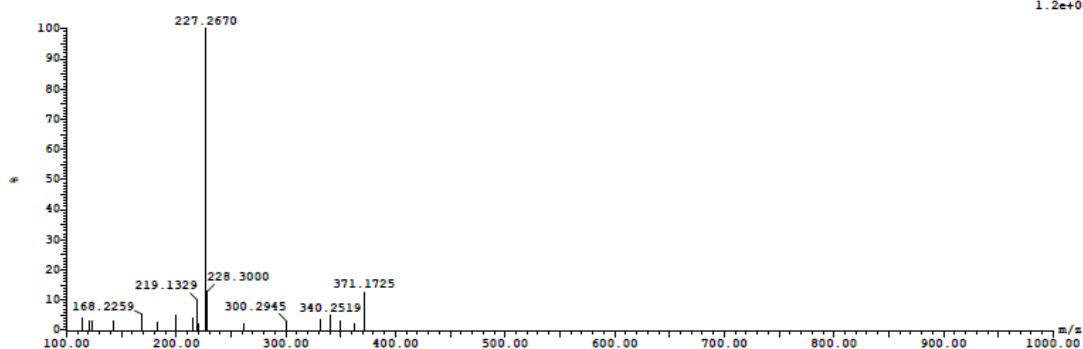



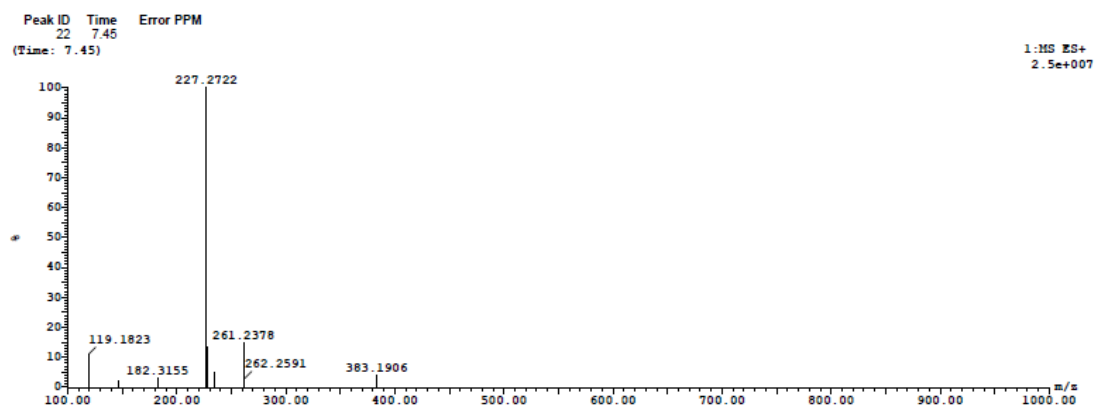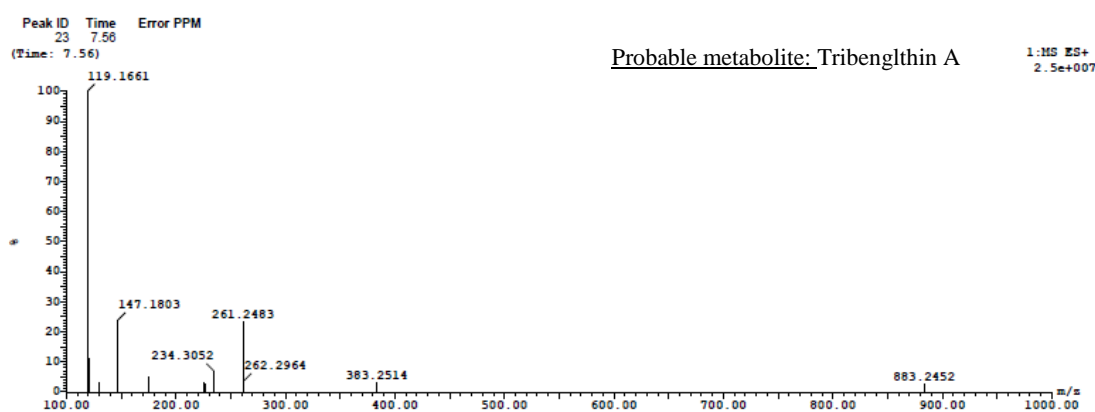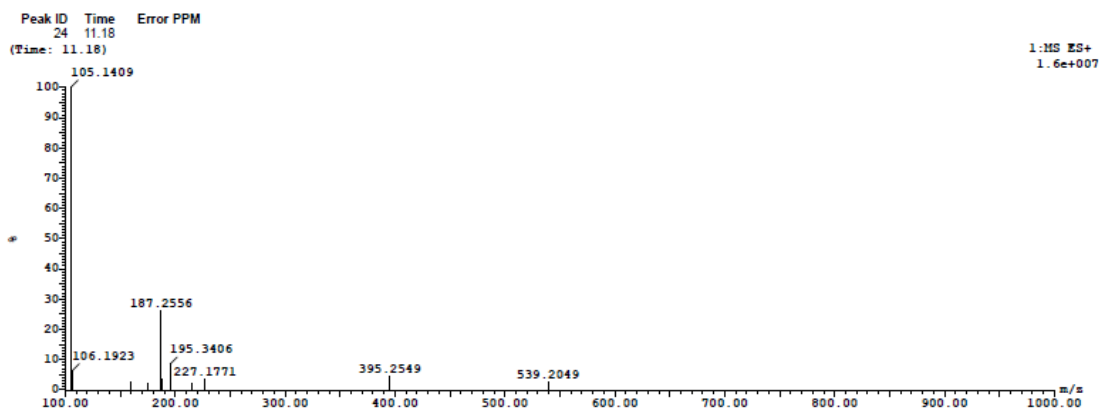

Peak ID Time Error PPM  
25 11.54

(Time: 11.54)

1:MS ES+  
2.1e+007

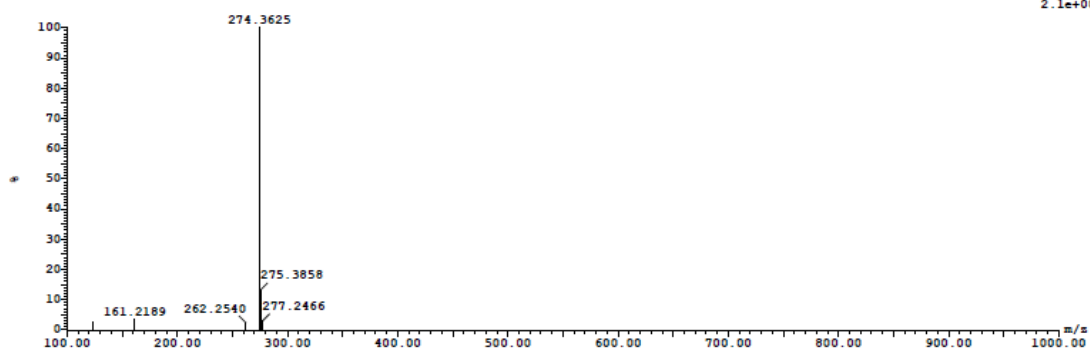

Peak ID Time Error PPM  
28 18.30

(Time: 18.30)

1:MS ES+  
5.6e+007

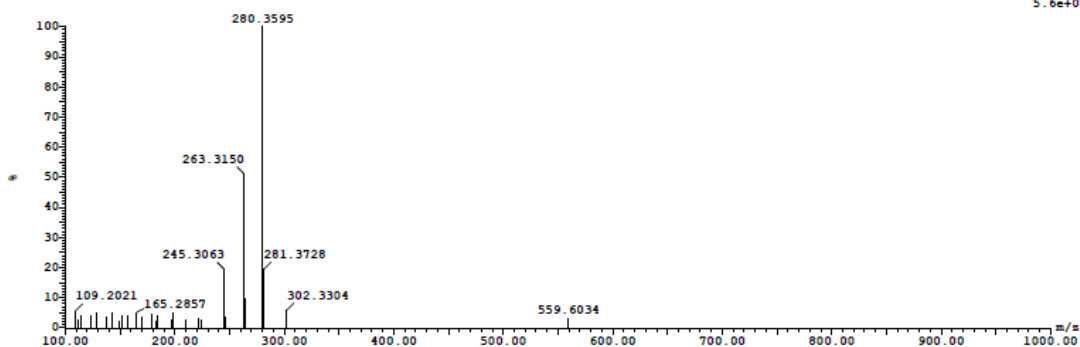

Peak ID Time Error PPM  
27 19.53

(Time: 19.53)

1:MS ES+  
1.2e+008

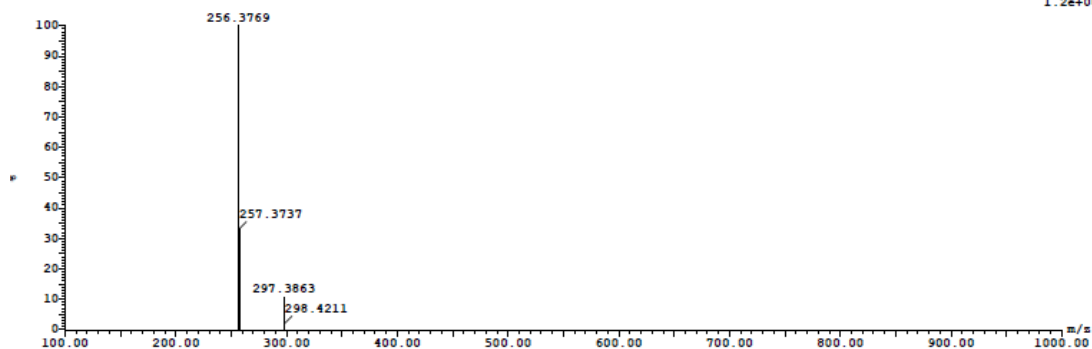

Peak ID Time Error PPM  
28 20.08  
(Time: 20.08)

1:MS ES+  
1.7e+008

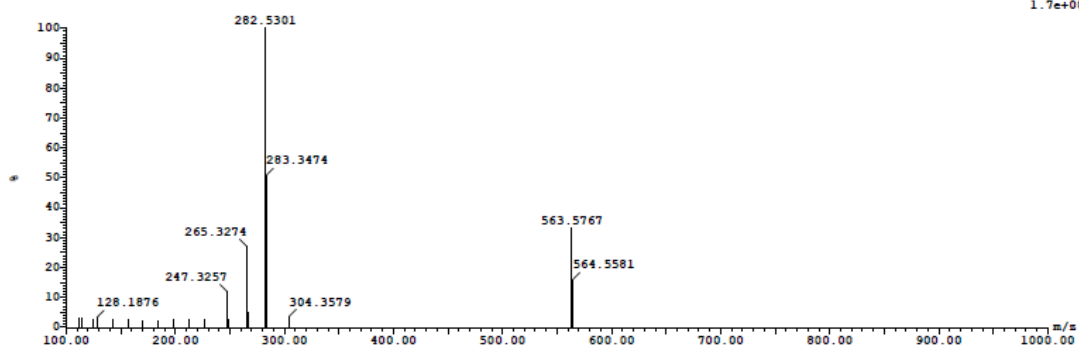

Peak ID Time Error PPM  
29 22.23  
(Time: 22.23)

1:MS ES+  
8.0e+007

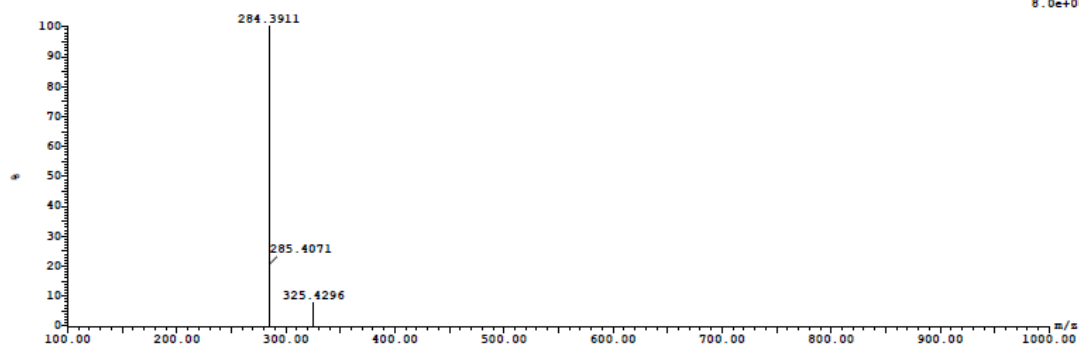

Peak ID Time Error PPM  
30 31.08  
(Time: 31.08)

1:MS ES+  
3.7e+007

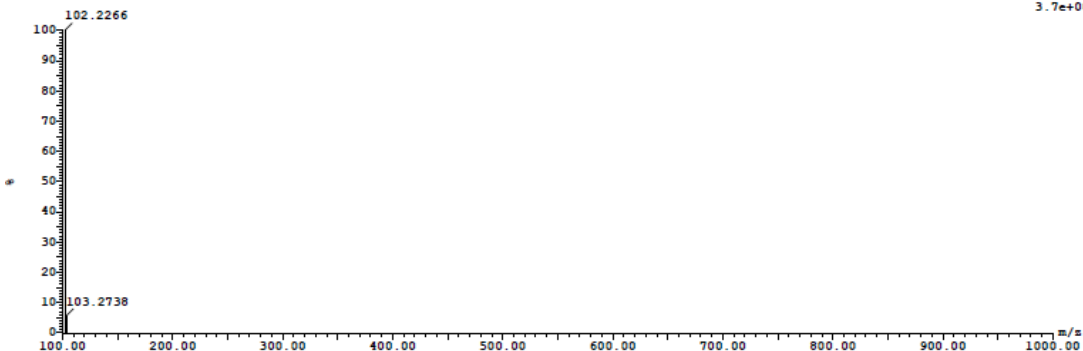

Peak ID Time Error PPM  
31 31.29  
(Time: 31.29)

Probable metabolite: Ieodomycin D

1:MS ES+  
4.4e+007

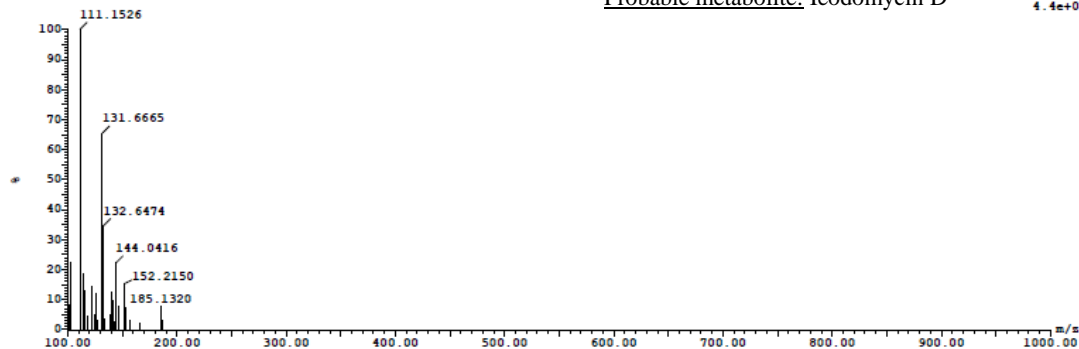

## Isolate: SS4

1: MS ES+ :BPI

1.4e+008

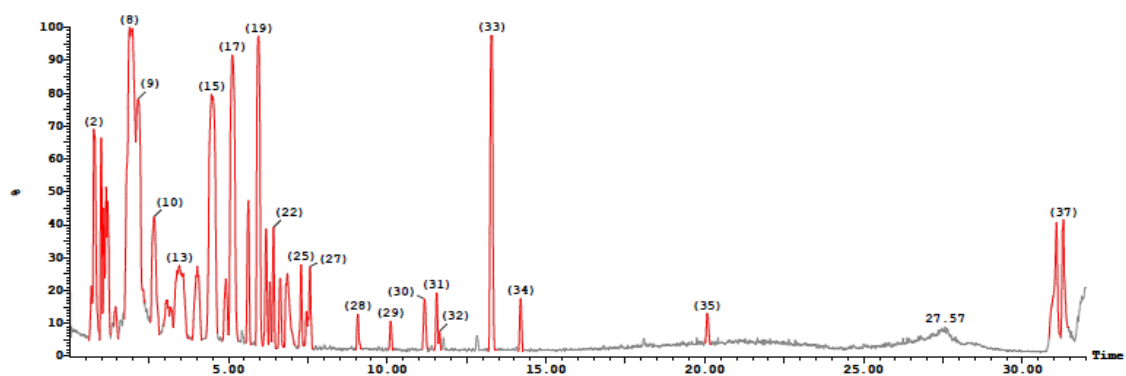

Peak ID 1  
Time 0.69  
Error PPM  
(Time: 0.69)

1:MS ES+  
1.8e+007

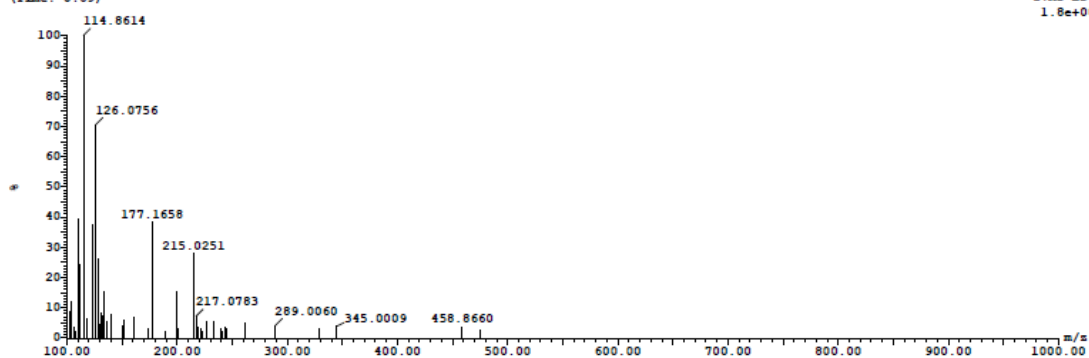

Peak ID 2  
Time 0.76  
Error PPM  
(Time: 0.76)

1:MS ES+  
4.9e+007

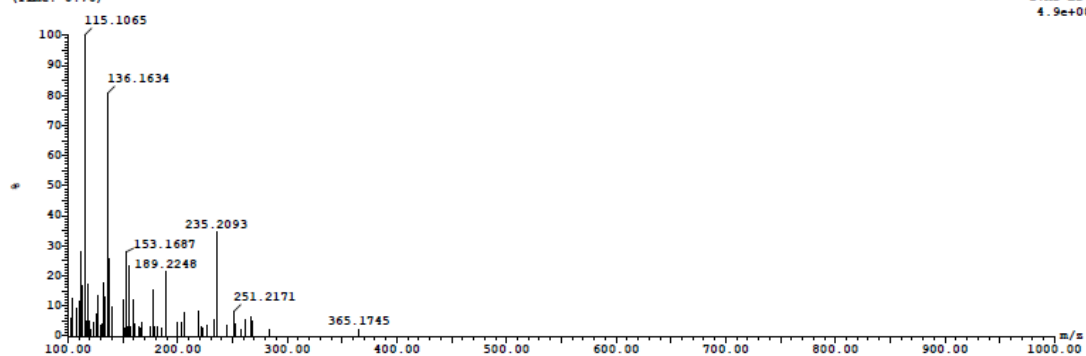

Peak ID Time Error PPM  
3 1.00  
(Time: 1.00)

1:MS ES+  
4.6e+007

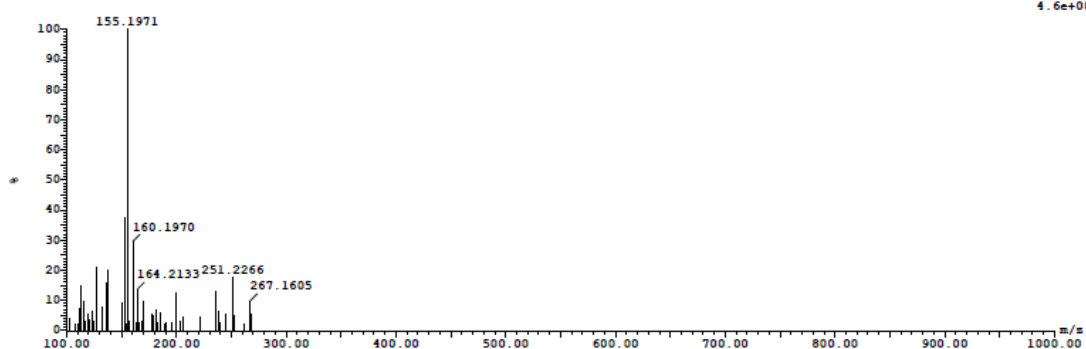

Peak ID Time Error PPM  
4 1.08  
(Time: 1.08)

1:MS ES+  
3.4e+007

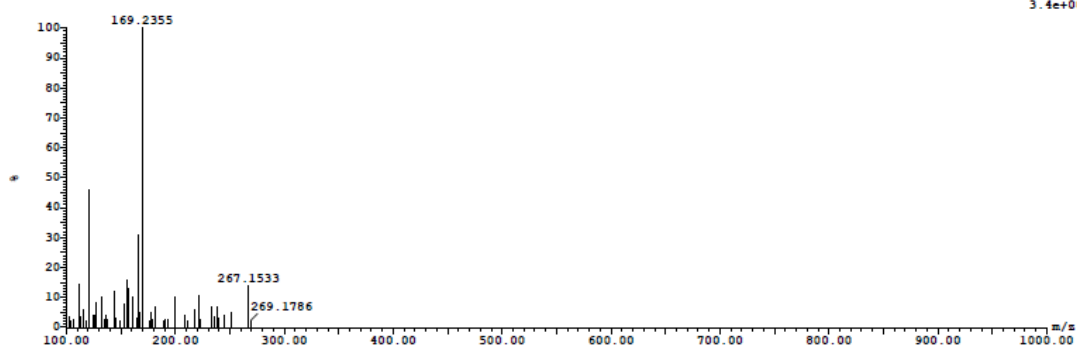

Peak ID Time Error PPM  
5 1.15  
(Time: 1.15)

1:MS ES+  
4.1e+007

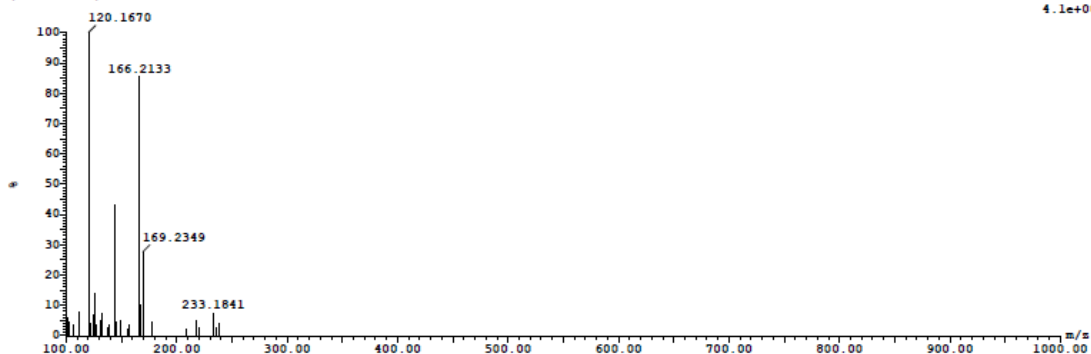

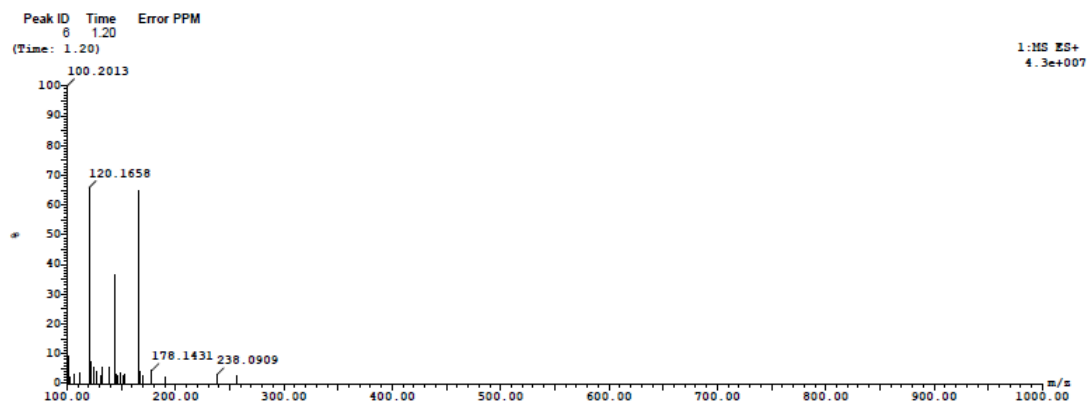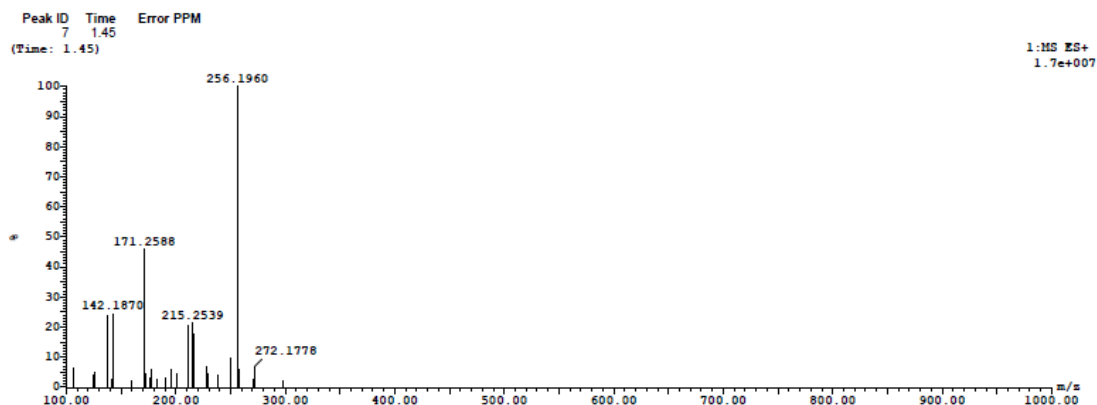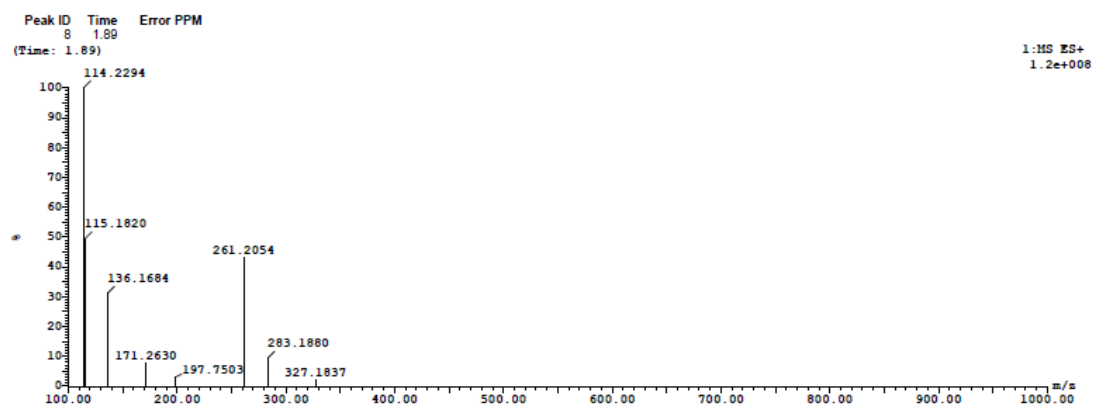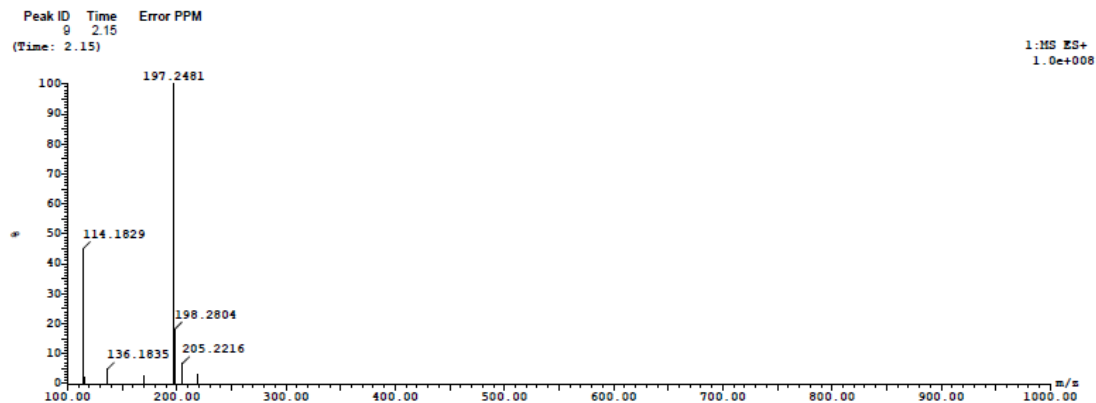

Peak ID Time Error PPM  
10 2.66  
(Time: 2.66)

1:MS ES+  
5.2e+007

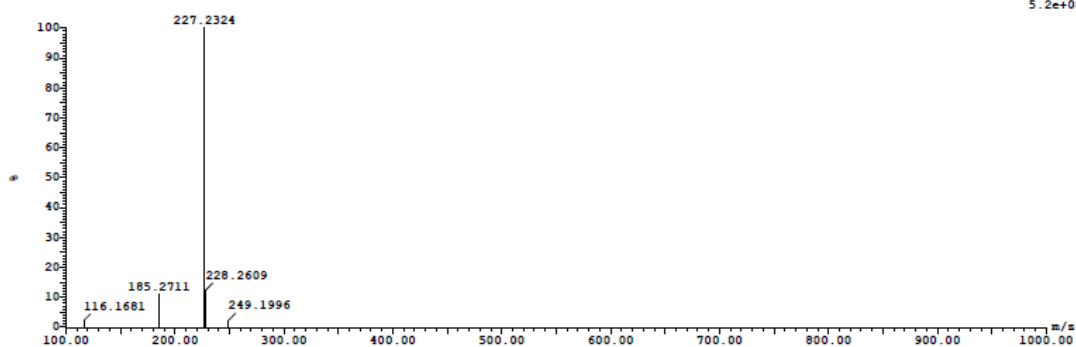

Peak ID Time Error PPM  
11 3.06  
(Time: 3.06)

1:MS ES+  
1.8e+007

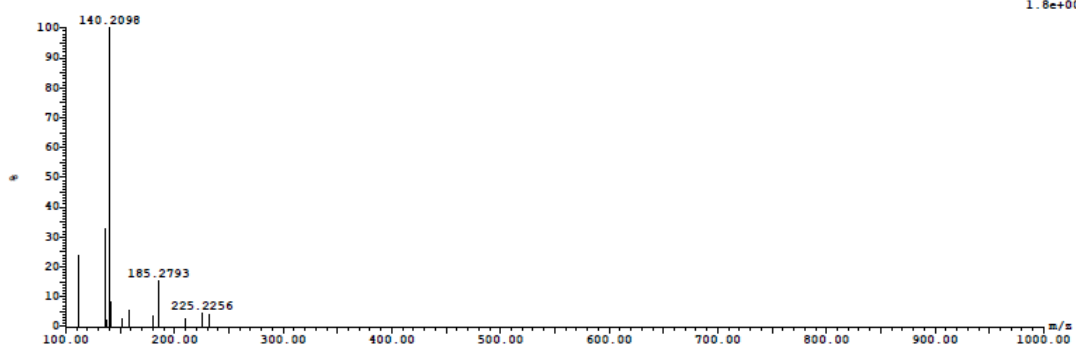

Peak ID Time Error PPM  
12 3.18  
(Time: 3.18)

1:MS ES+  
1.8e+007

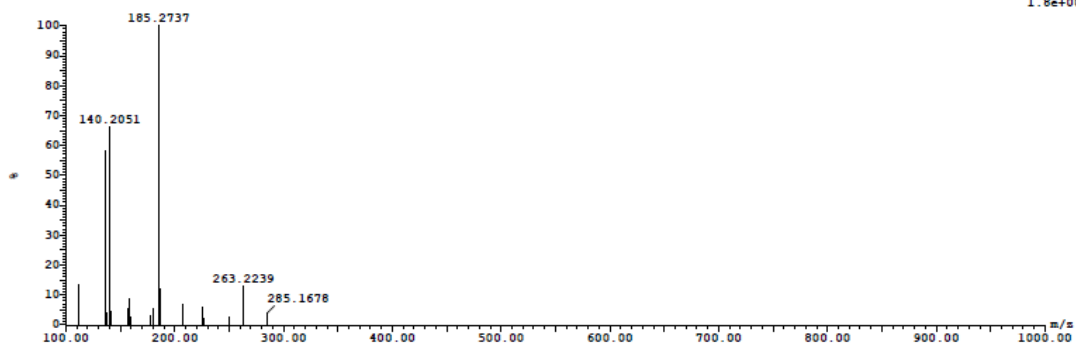

Peak ID Time Error PPM  
13 3.46  
(Time: 3.46)

1:MS ES+  
3.6e+007

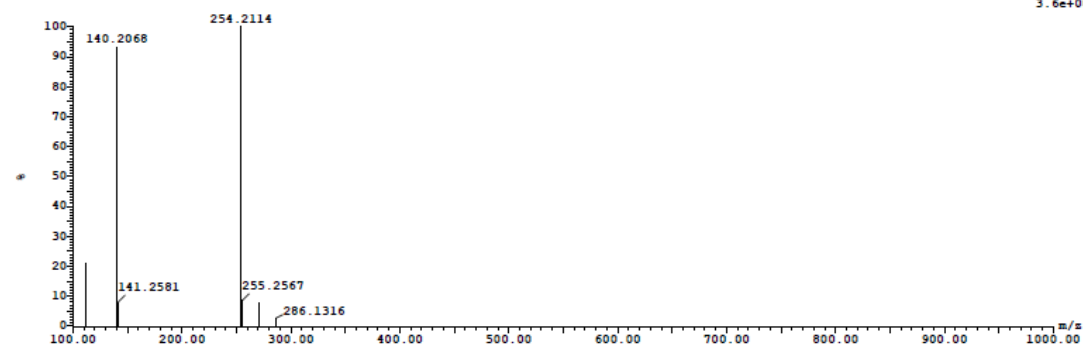

Peak ID Time Error PPM  
14 4.02

1:MS ES+  
3.3e+007

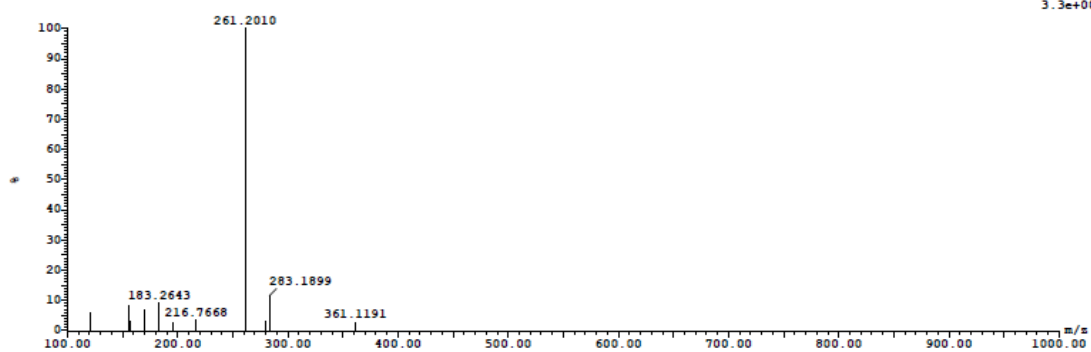

Peak ID Time Error PPM  
15 4.47

1:MS ES+  
5.6e+007

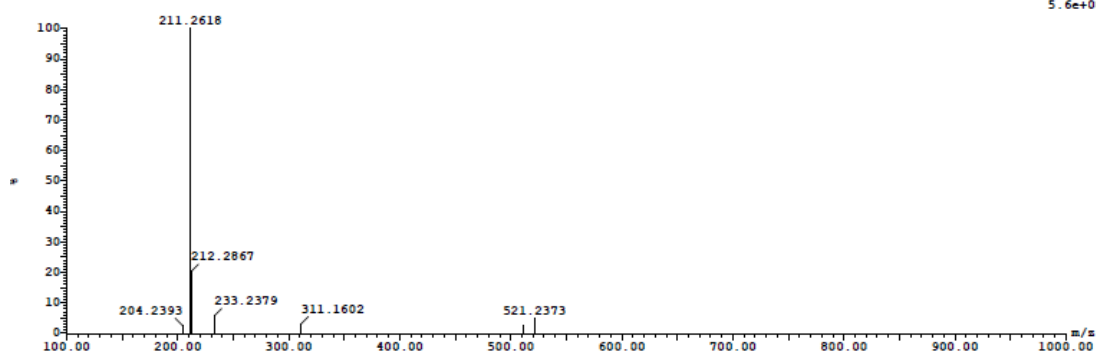

Peak ID Time Error PPM  
16 4.92

1:MS ES+  
2.3e+007

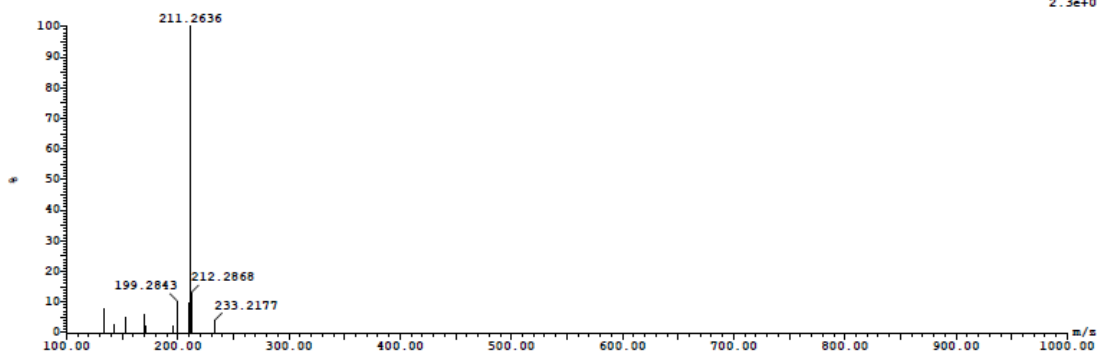

Peak ID Time Error PPM  
17 5.12

1:MS ES+  
6.4e+007

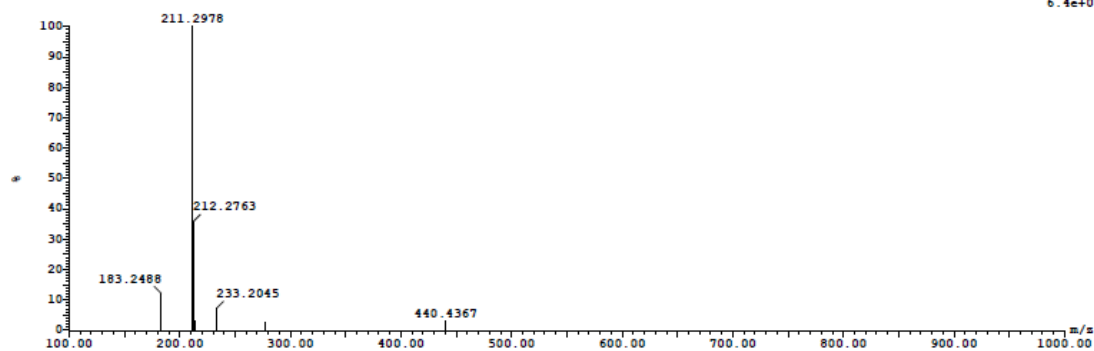



Peak ID Time Error PPM  
18 5.63  
(Time: 5.63)

1:MS ES+  
4.2e+007

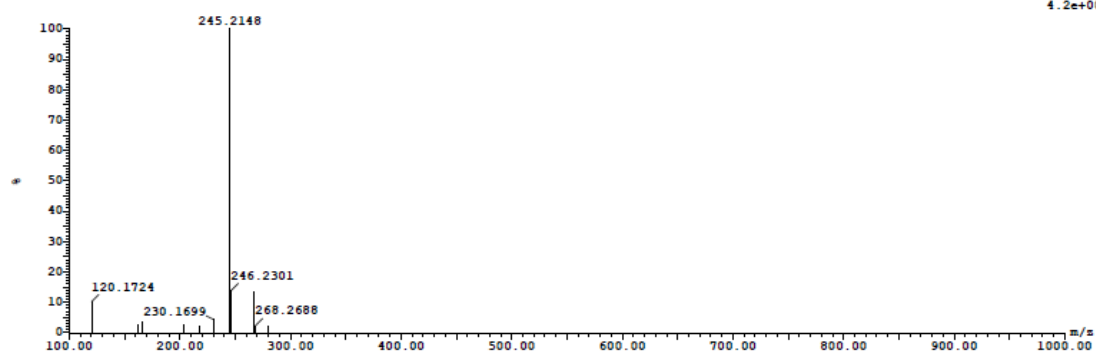

Peak ID Time Error PPM  
19 5.95  
(Time: 5.95)

1:MS ES+  
1.2e+008

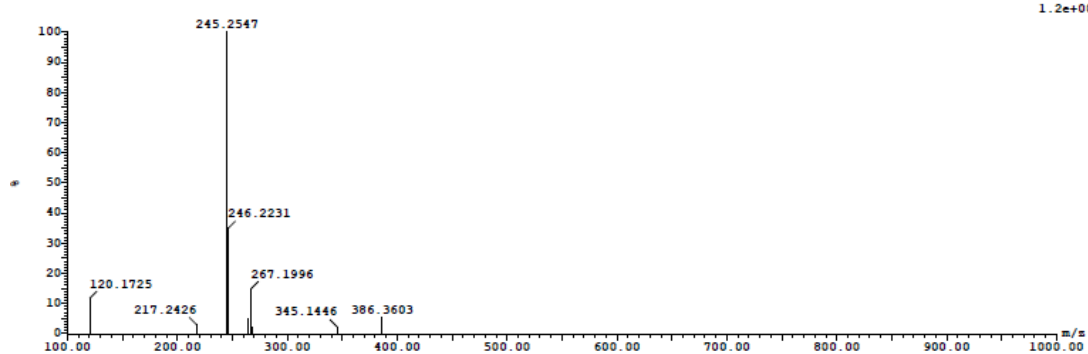

Peak ID Time Error PPM  
20 6.19  
(Time: 6.19)

1:MS ES+  
3.3e+007

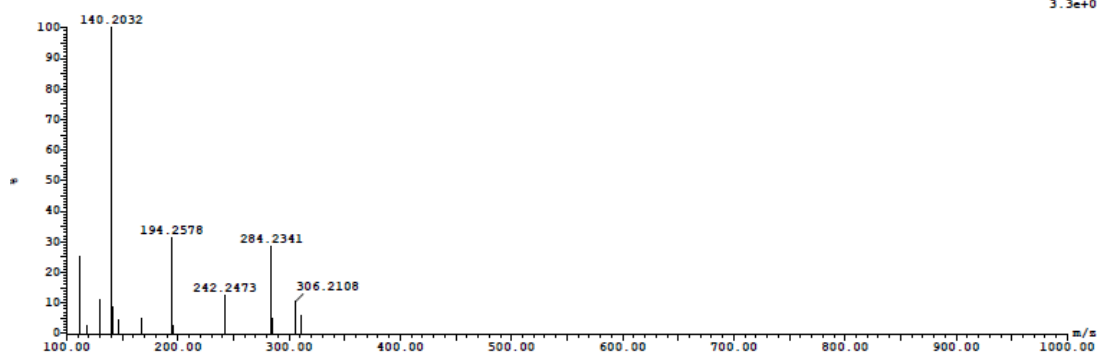

Peak ID Time Error PPM  
21 6.30  
(Time: 6.30)

1:MS ES+  
1.6e+007

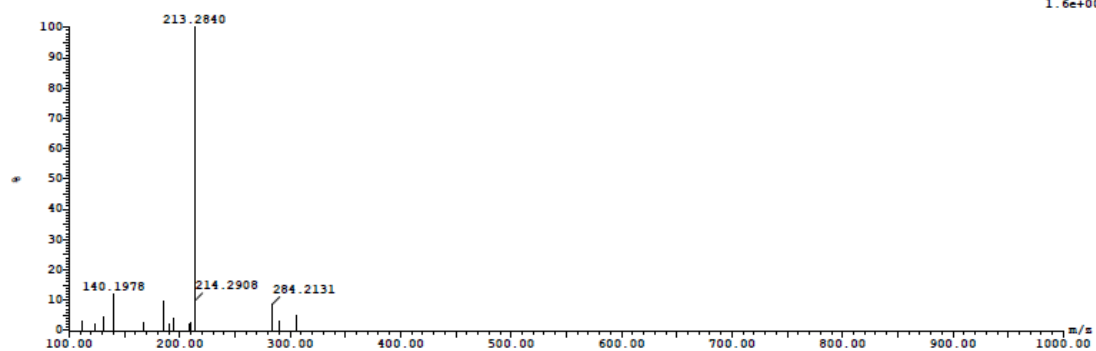

Peak ID Time Error PPM  
22 6.42  
(Time: 6.42)

1:MS ES+  
3.0e+007

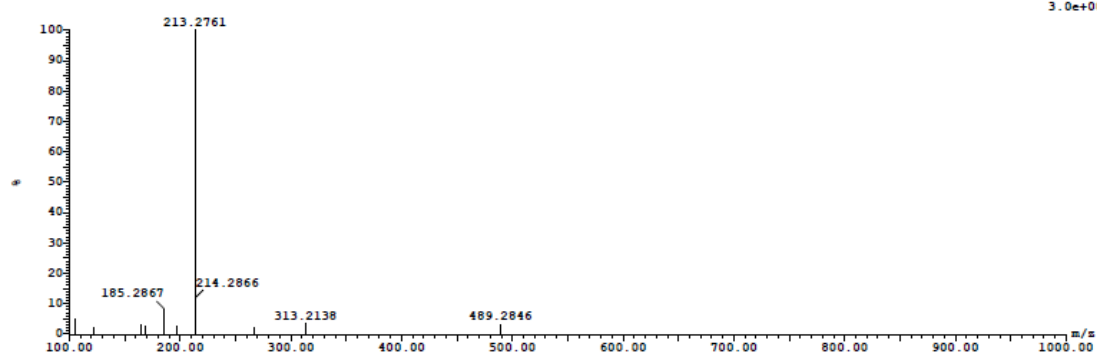

Peak ID Time Error PPM  
23 6.63  
(Time: 6.63)

1:MS ES+  
2.2e+007

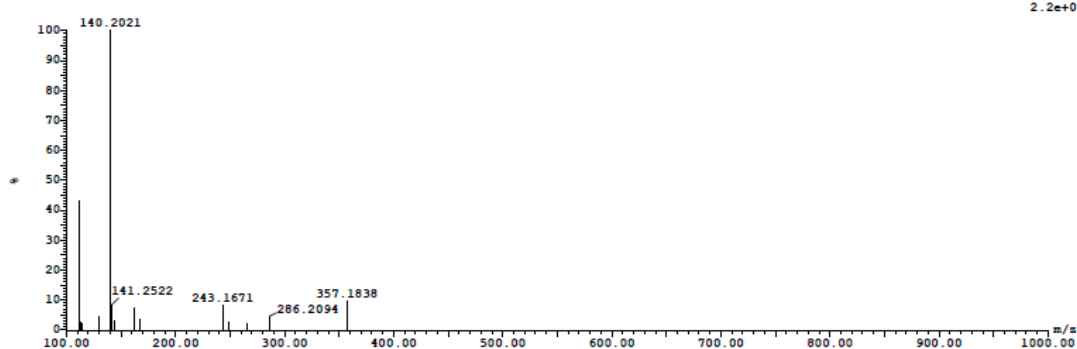

Peak ID Time Error PPM  
24 6.85  
(Time: 6.85)

1:MS ES+  
2.8e+007

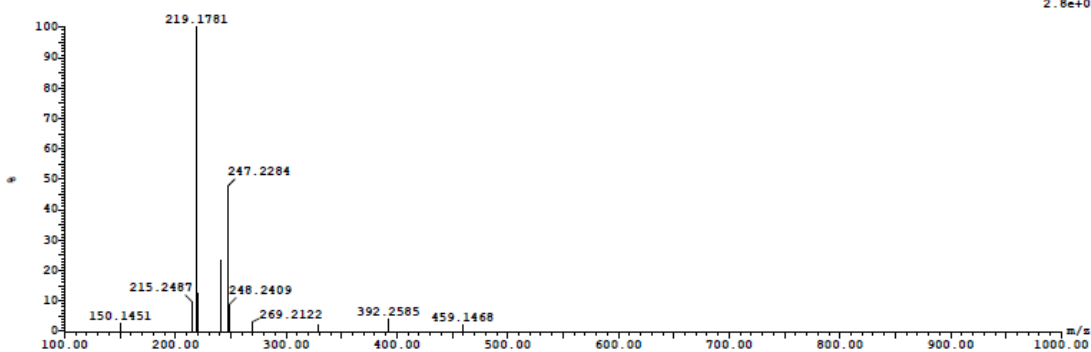

Peak ID Time Error PPM  
25 7.29  
(Time: 7.29)

1:MS ES+  
2.0e+007

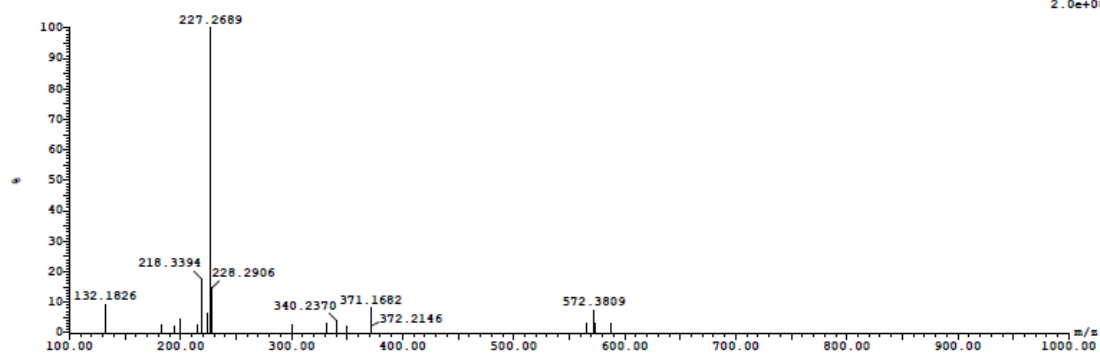

Peak ID Time Error PPM  
26 7.46  
(Time: 7.46)

1:MS ES+  
9.5e+006

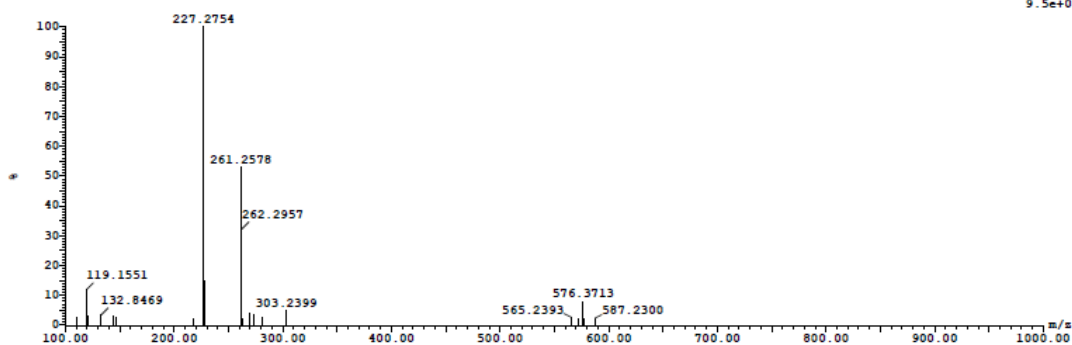

Peak ID Time Error PPM  
27 7.57  
(Time: 7.57)

1:MS ES+  
2.2e+007

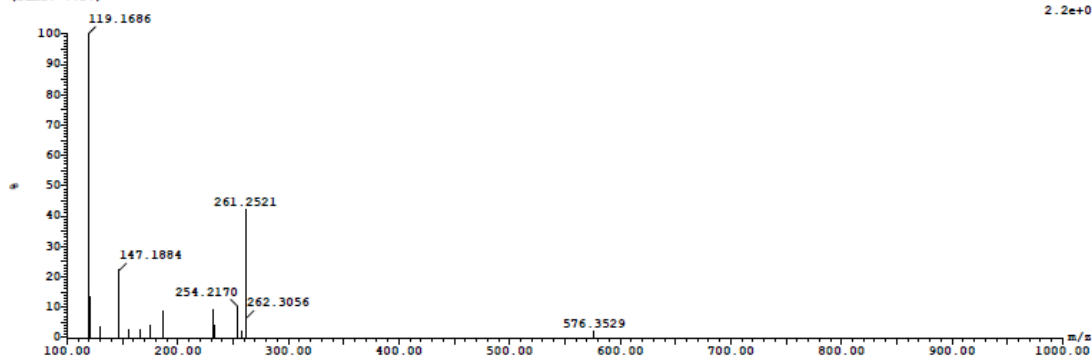

Peak ID Time Error PPM  
28 9.07  
(Time: 9.07)

Probable metabolite: Bacilosarcin B

1:MS ES+  
1.1e+007

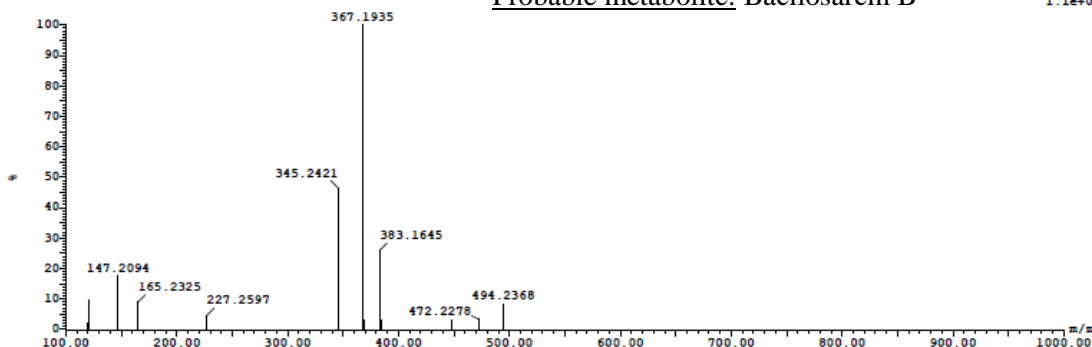

Peak ID Time Error PPM  
29 10.11  
(Time: 10.11)

1:MS ES+  
9.1e+006

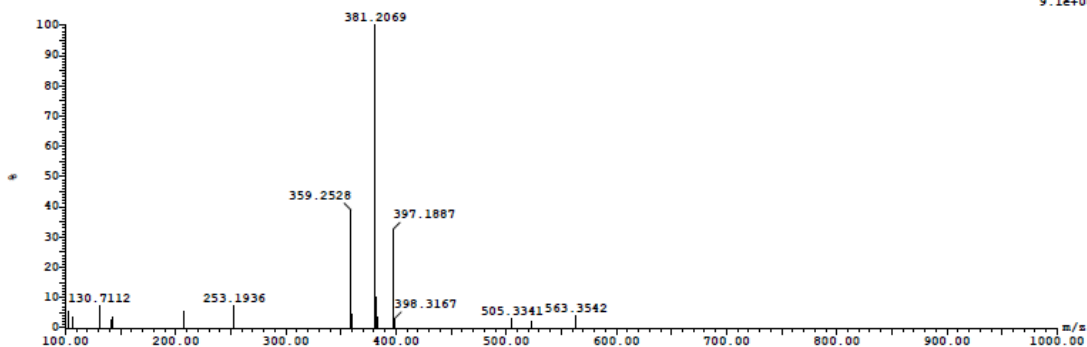

Peak ID Time Error PPM  
30 11.17

(Time: 11.17)

1:MS ES+  
1.7e+007

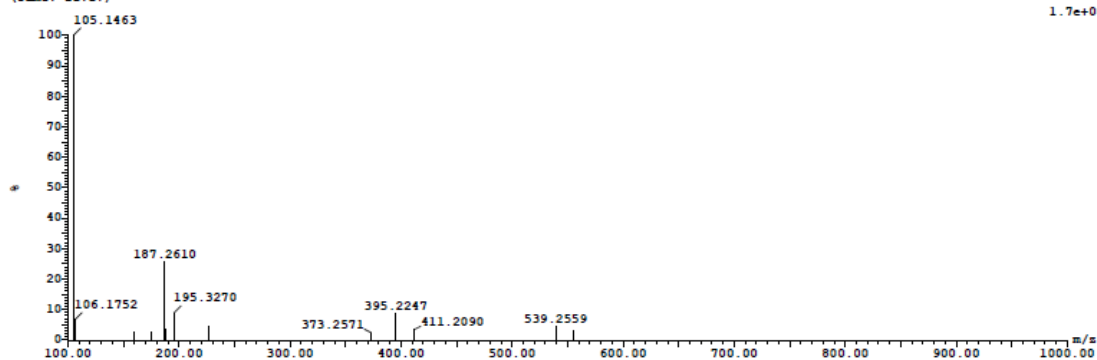

Peak ID Time Error PPM  
31 11.55

(Time: 11.55)

1:MS ES+  
1.6e+007

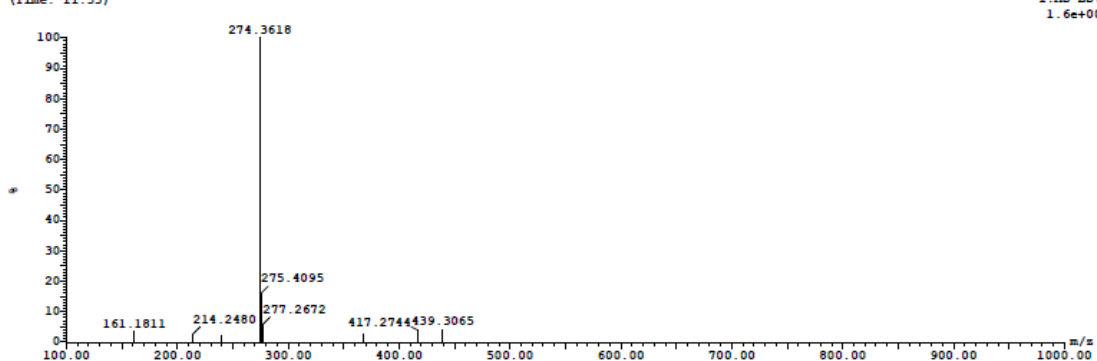

Peak ID Time Error PPM  
32 11.65

(Time: 11.65)

1:MS ES+  
5.8e+006

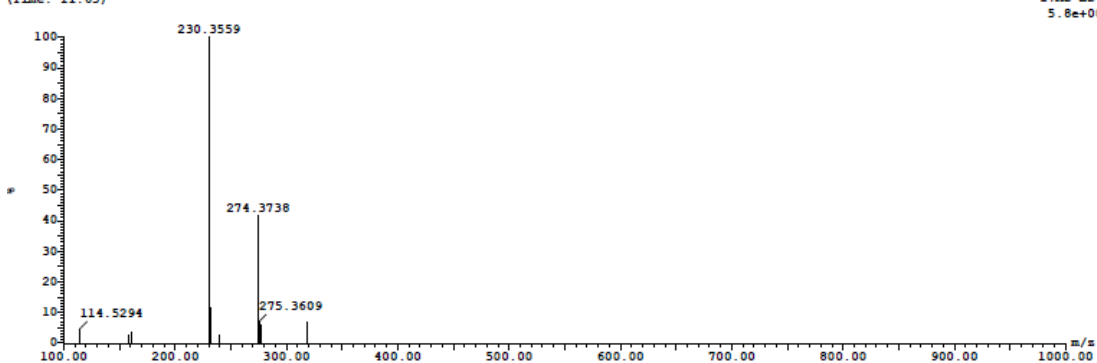

Peak ID Time Error PPM  
33 13.30

(Time: 13.30)

1:MS ES+  
1.0e+008

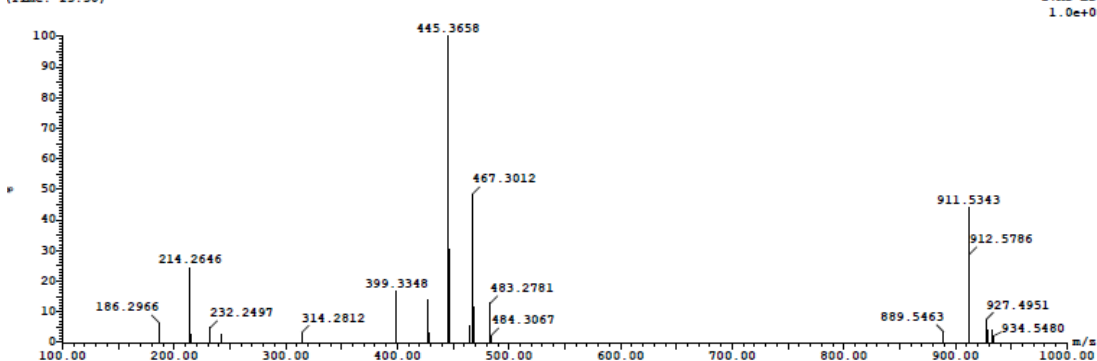

Peak ID Time Error PPM  
34 14.20  
(Time: 14.20)

1:MS ES+  
1.6e+007

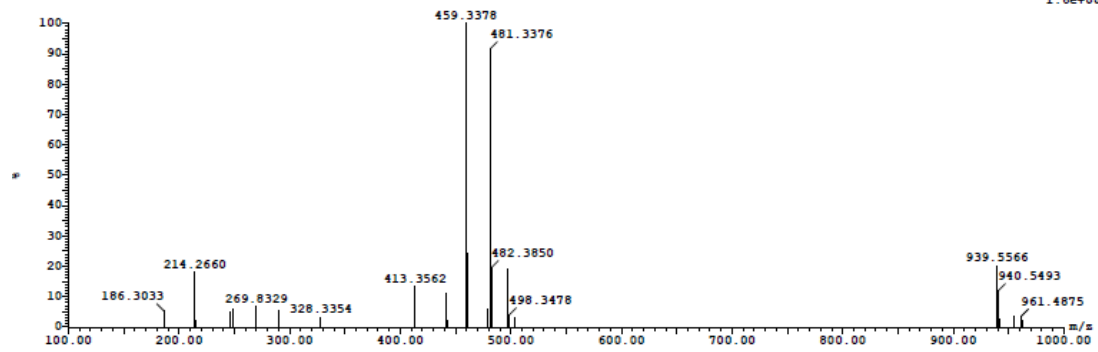

Peak ID Time Error PPM  
35 20.07  
(Time: 20.07)

1:MS ES+  
1.4e+007

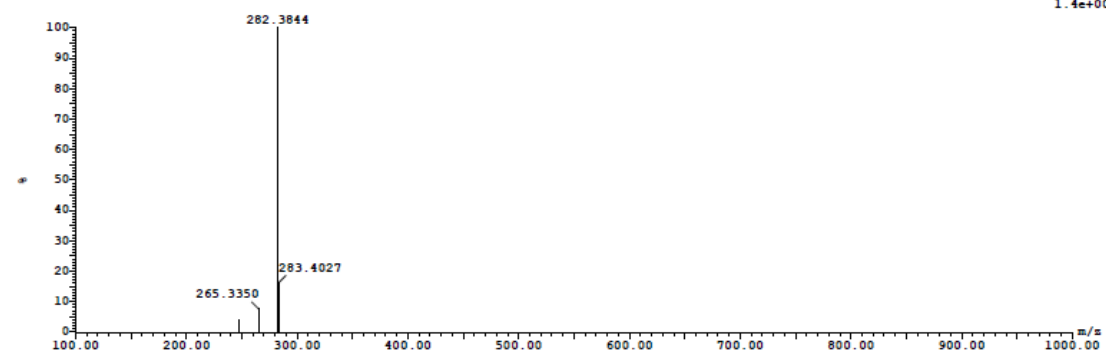

Peak ID Time Error PPM  
36 31.07  
(Time: 31.07)

1:MS ES+  
3.8e+007

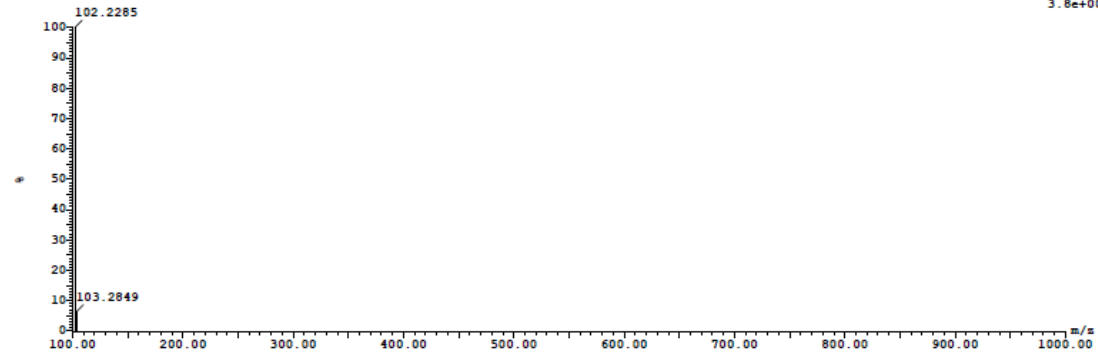

Peak ID Time Error PPM  
37 31.29  
(Time: 31.29)

1:MS ES+  
4.2e+007

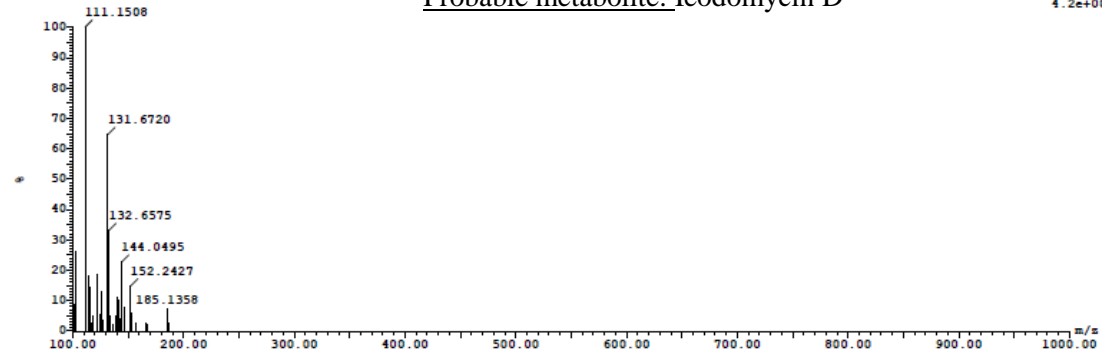

Probable metabolite: Ieodomycin D

# Isolate SW11

1: MS ES+ :BPI

1.4e+008

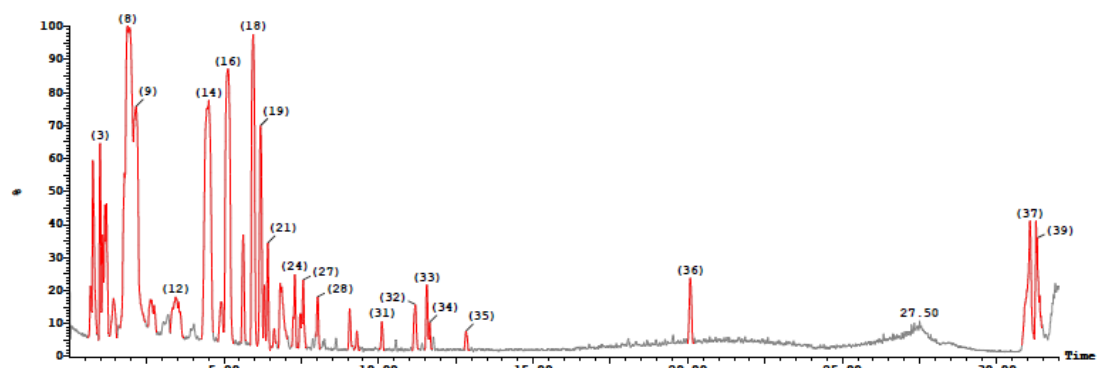

Peak ID Time Error PPM  
1 0.69  
(Time: 0.69)

1:MS ES+  
1.4e+007

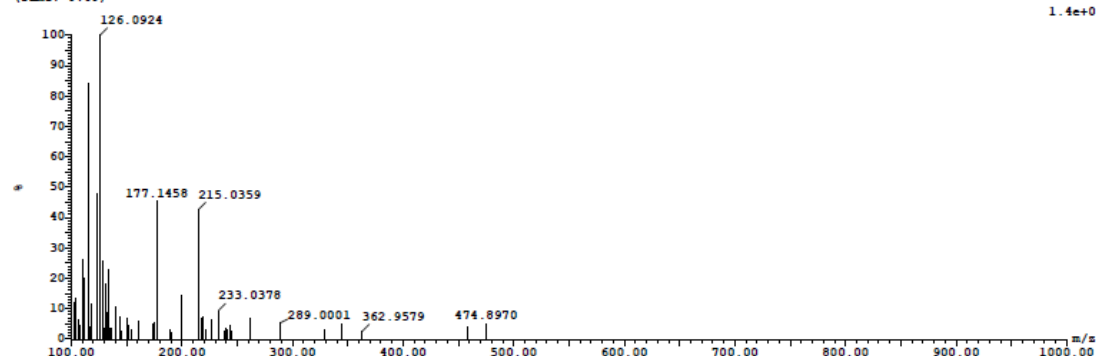

Peak ID Time Error PPM  
2 0.76  
(Time: 0.76)

1:MS ES+  
4.0e+007

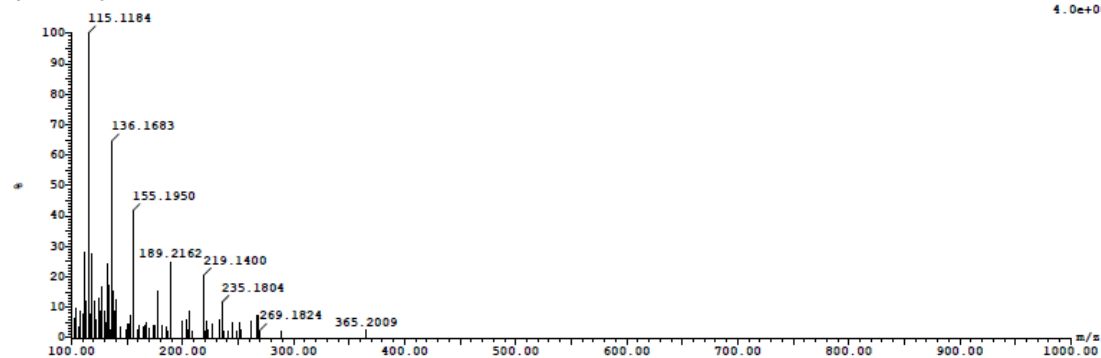

Peak ID Time Error PPM  
3 1.00  
(Time: 1.00)

1:MS ES+  
4.3e+007

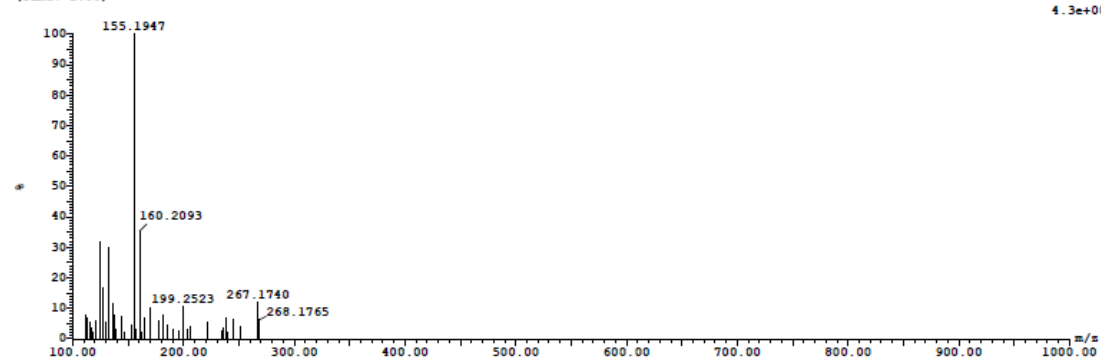

Peak ID Time Error PPM  
4 1.08  
(Time: 1.08)

1:MS ES+  
2.9e+007

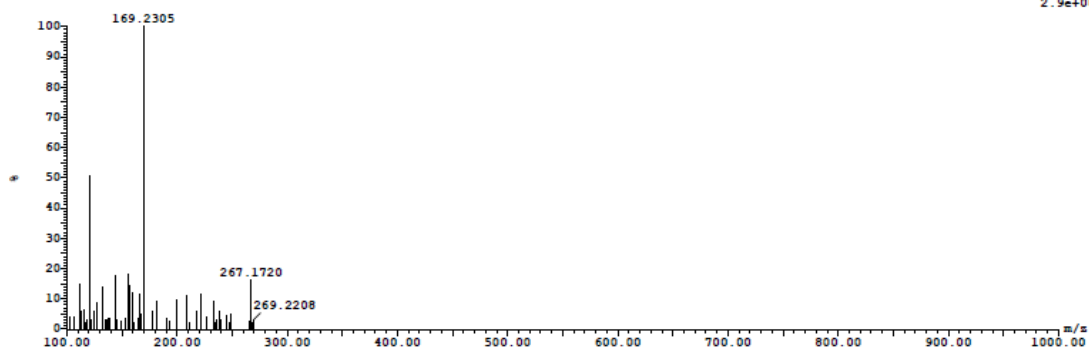

Peak ID Time Error PPM  
5 1.15  
(Time: 1.15)

1:MS ES+  
3.7e+007

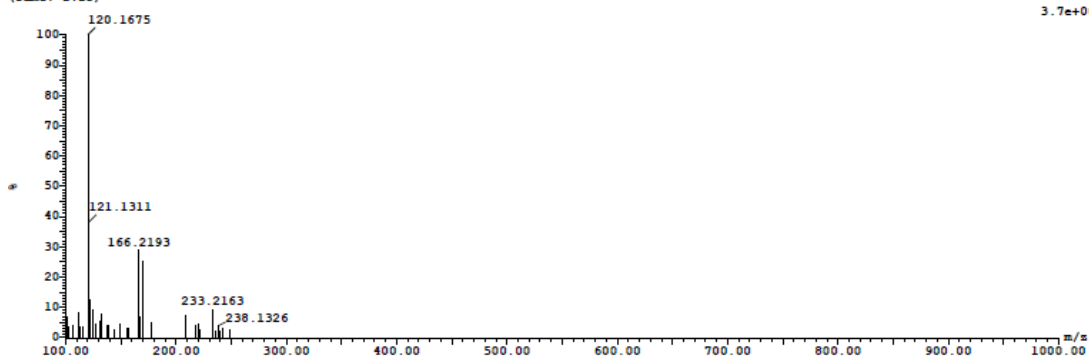

Peak ID Time Error PPM  
6 1.20  
(Time: 1.20)

1:MS ES+  
4.3e+007

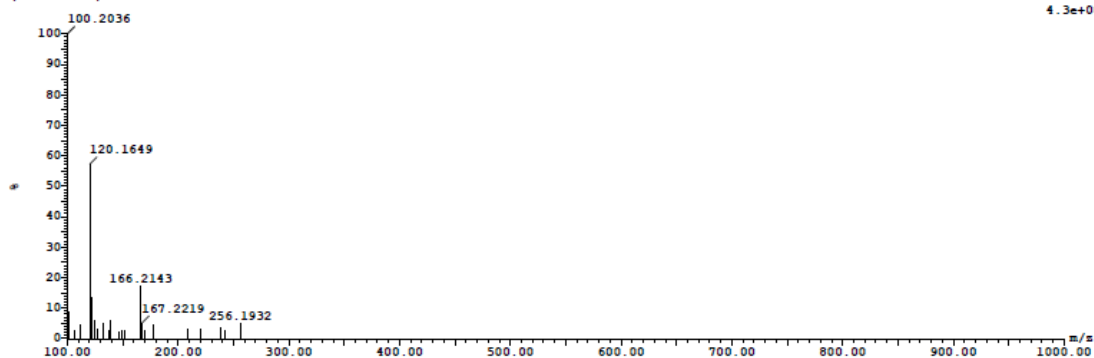

Peak ID Time Error PPM  
7 1.43  
(Time: 1.43)

1:MS ES+  
2.0e+007

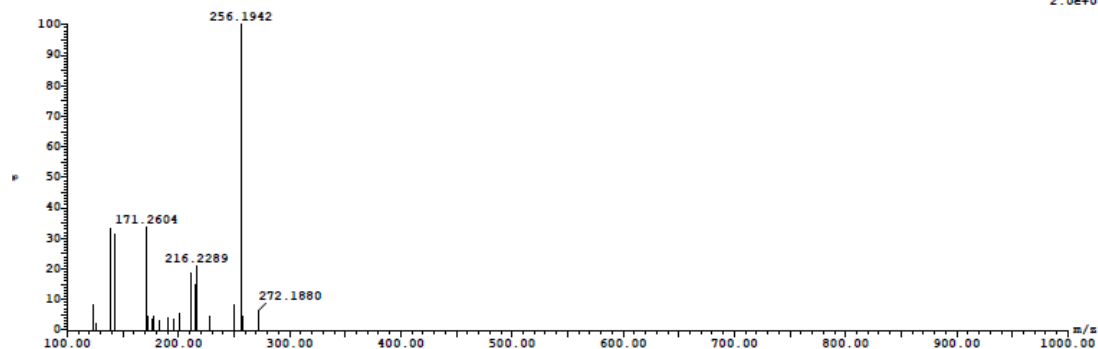

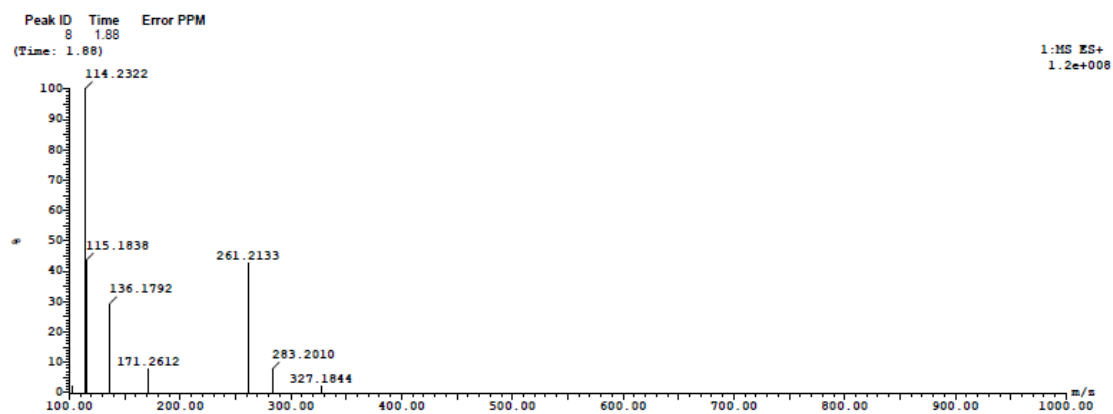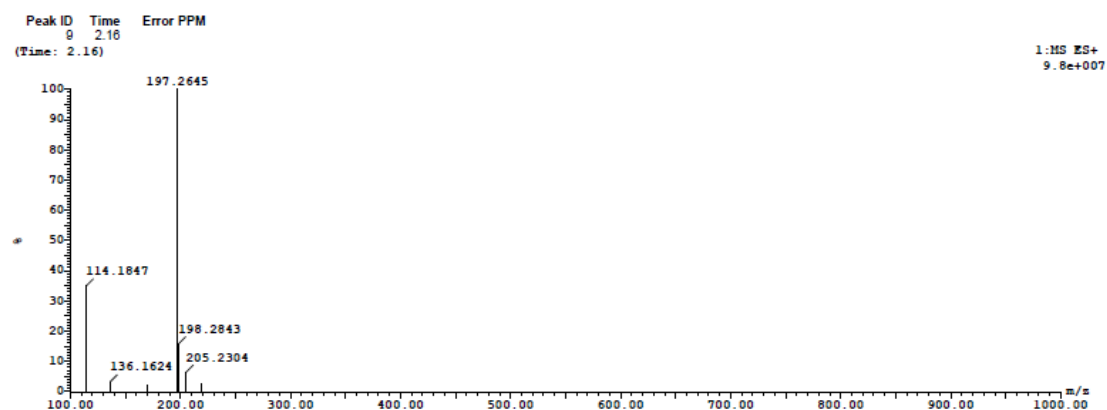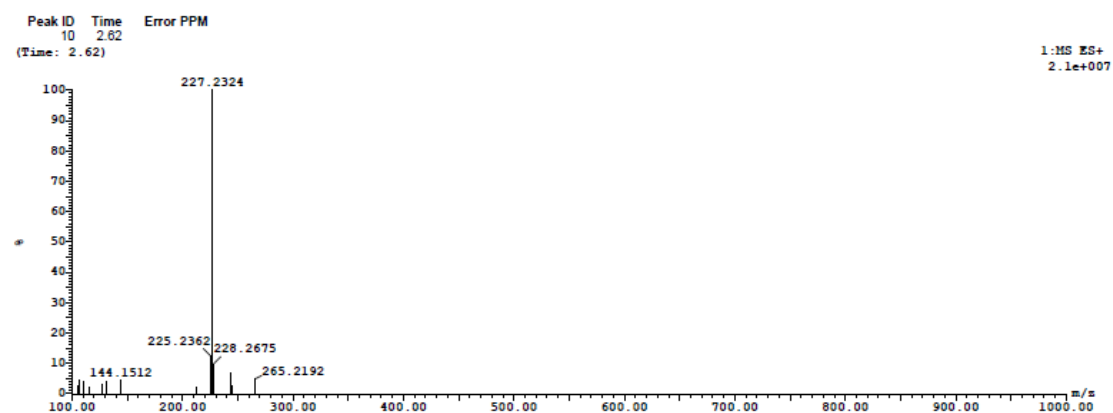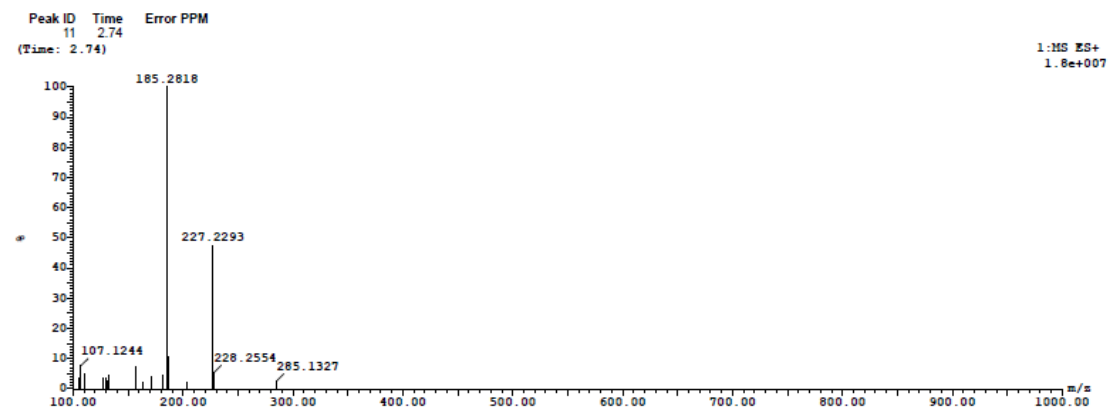



Peak ID Time Error PPM  
12 3.44  
(Time: 3.44)

1:MS ES+  
2.3e+007

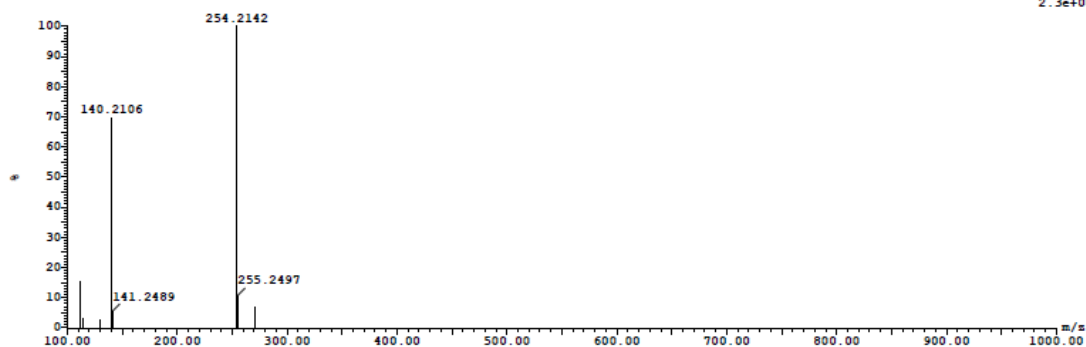

Peak ID Time Error PPM  
13 3.53  
(Time: 3.53)

1:MS ES+  
1.7e+007

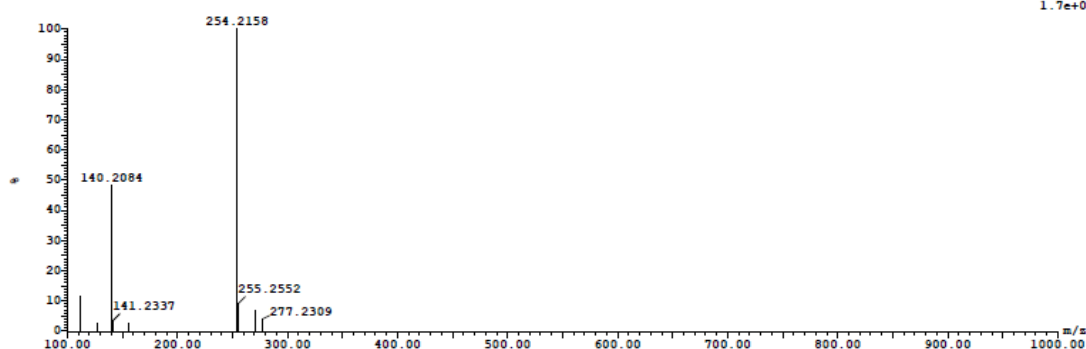

Peak ID Time Error PPM  
14 4.51  
(Time: 4.51)

1:MS ES+  
4.9e+007

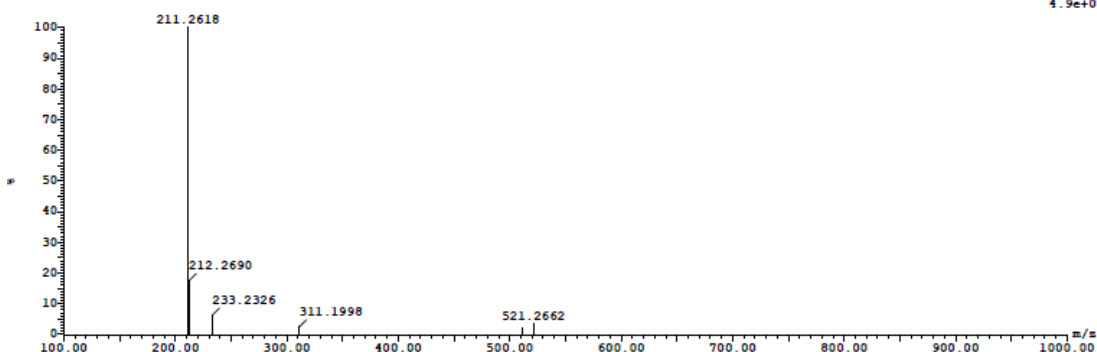

Peak ID Time Error PPM  
15 4.91  
(Time: 4.91)

1:MS ES+  
1.5e+007

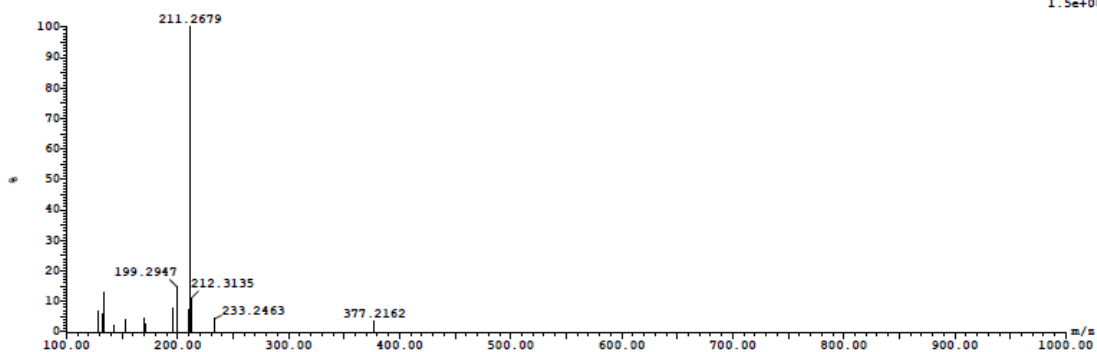

Probable metabolite: Limnazine

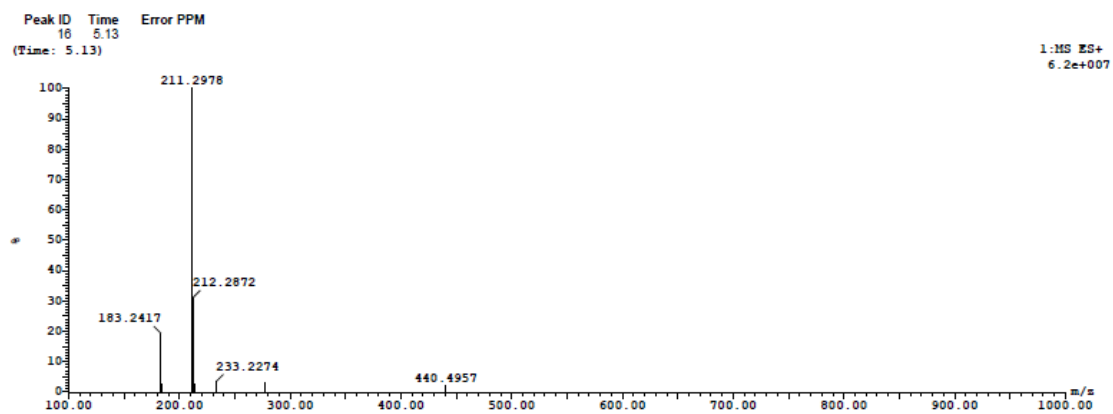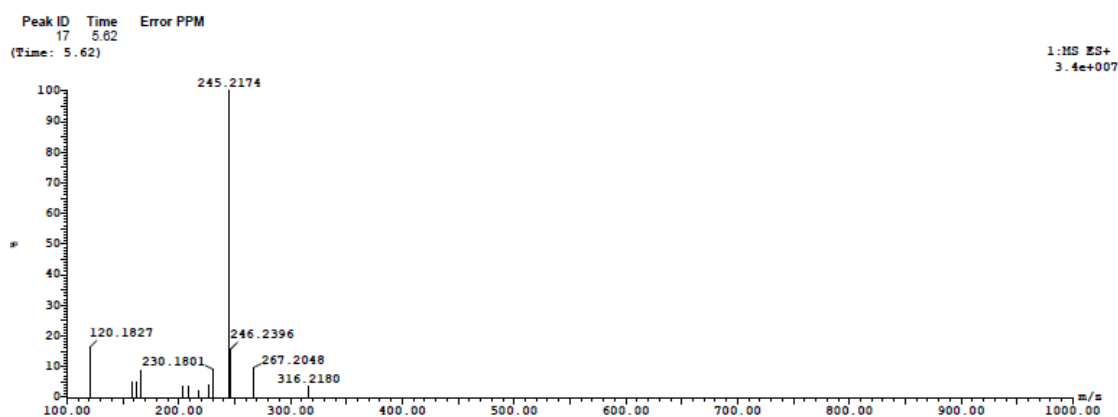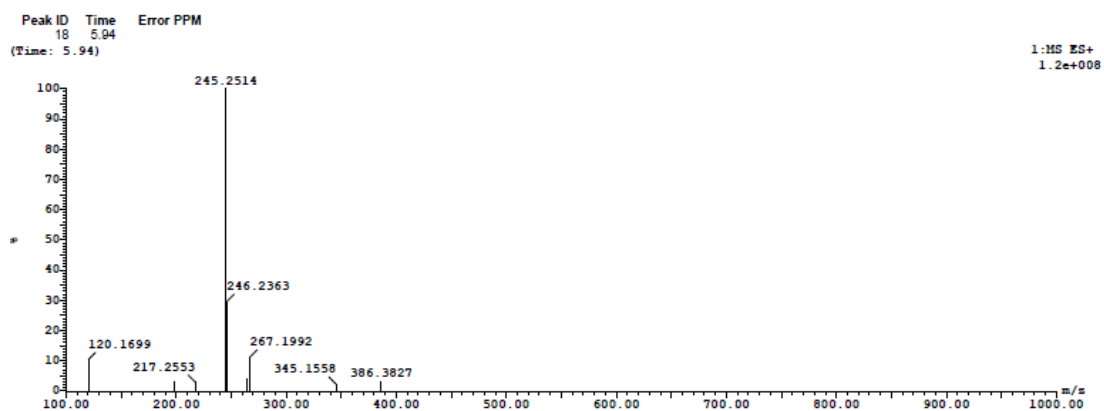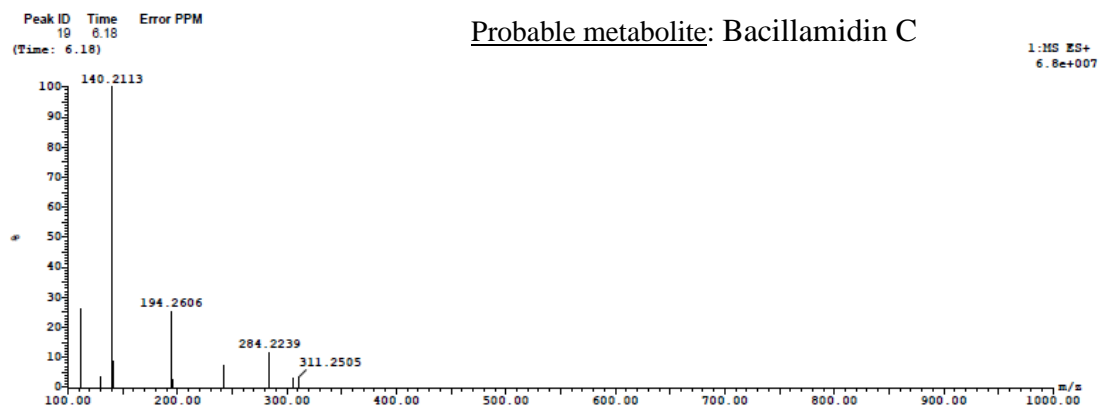

Peak ID Time Error PPM  
20 6.31  
(Time: 6.31)

1:MS ES+  
1.5e+007

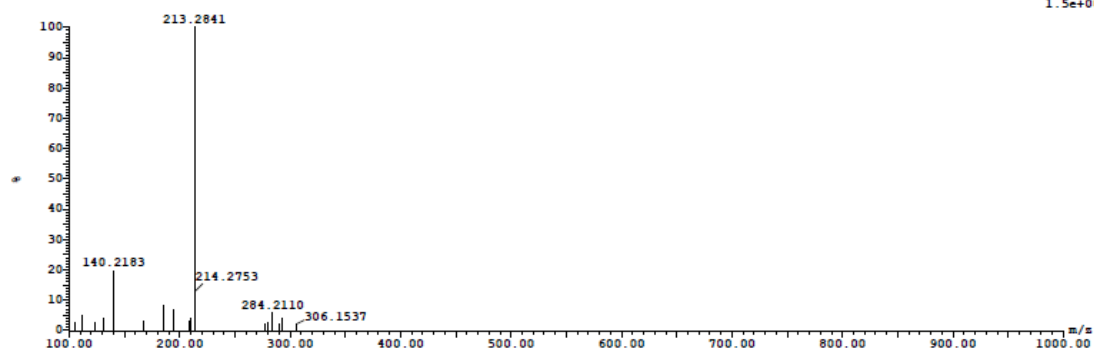

Peak ID Time Error PPM  
21 6.42  
(Time: 6.42)

1:MS ES+  
2.7e+007

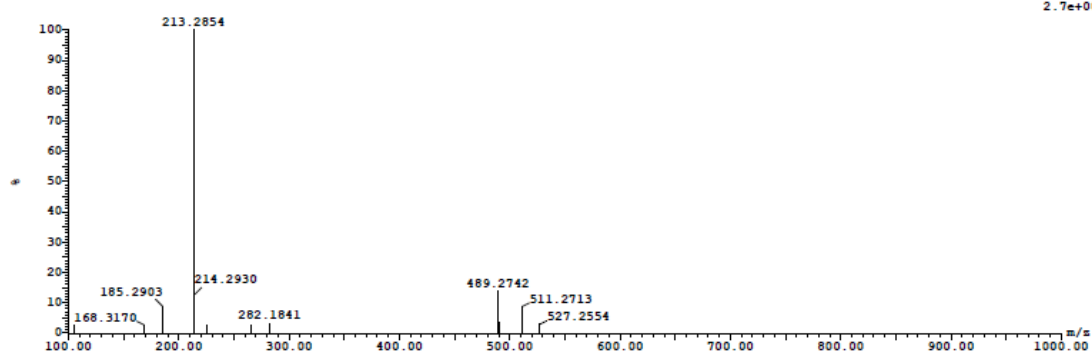

Peak ID Time Error PPM  
22 6.62

1:MS ES+  
6.9e+006

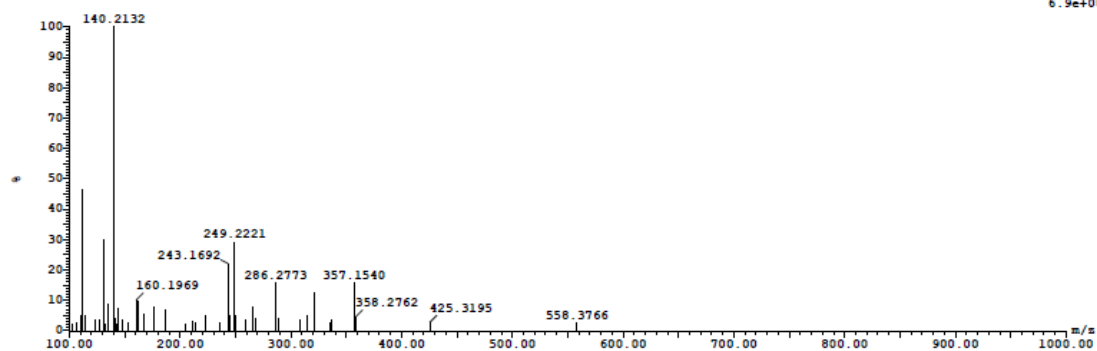

Peak ID Time Error PPM  
23 6.82

1:MS ES+  
1.6e+007

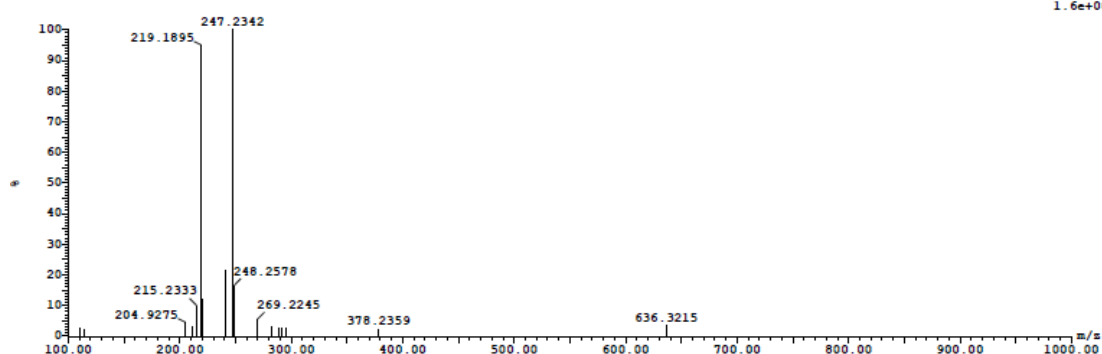

Peak ID Time Error PPM  
24 7.29

1:MS ES+  
1.8e+007

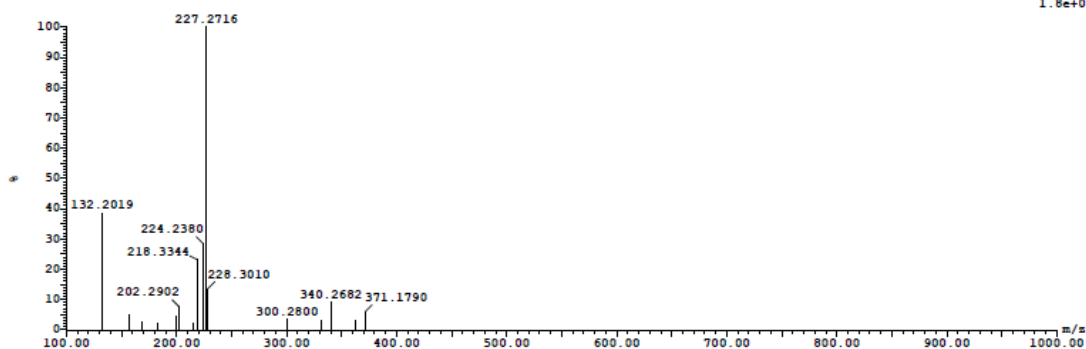

Peak ID Time Error PPM  
25 7.46

1:MS ES+  
8.7e+006

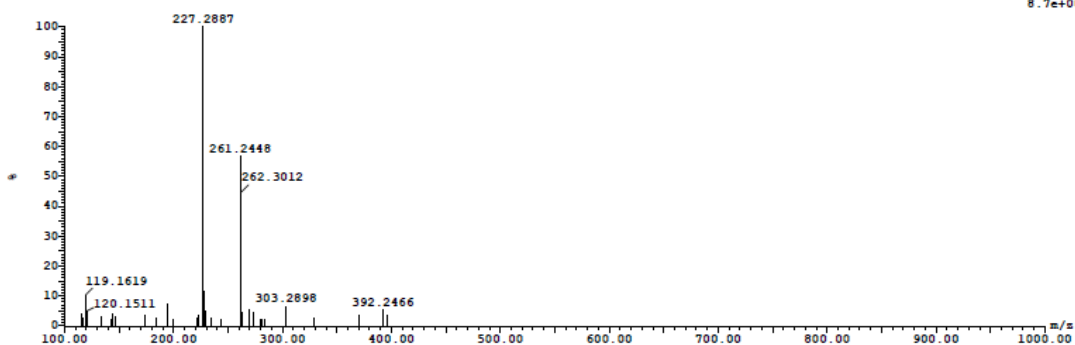

Peak ID Time Error PPM  
26 7.51  
(Time: 7.51)

Probable metabolite: Macrolactin N

1:MS ES+  
1.0e+007

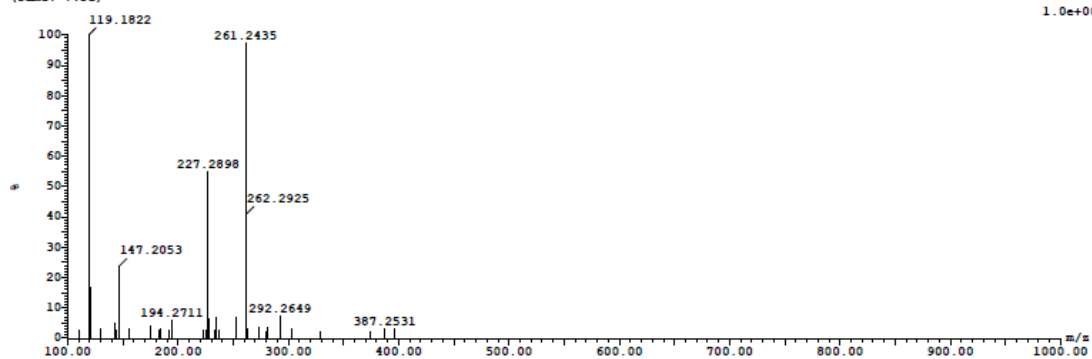

Peak ID Time Error PPM  
27 7.56  
(Time: 7.56)

1:MS ES+  
1.9e+007

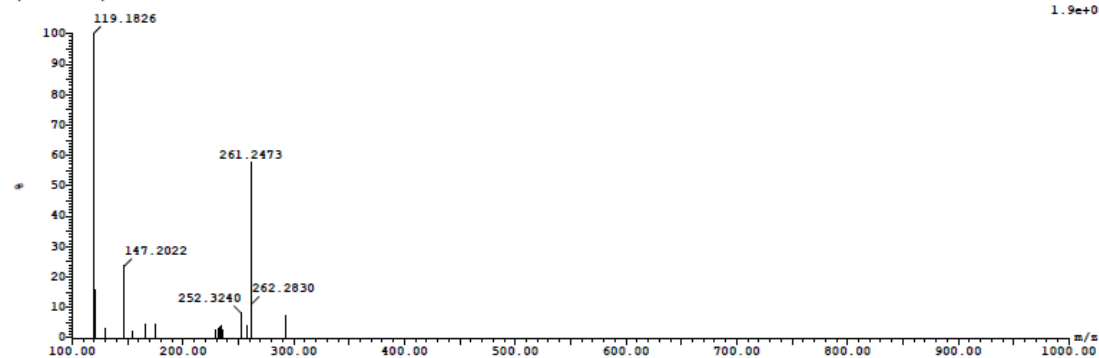

Peak ID Time Error PPM  
28 8.02  
(Time: 8.02)

1:MS ES+  
1.6e+007

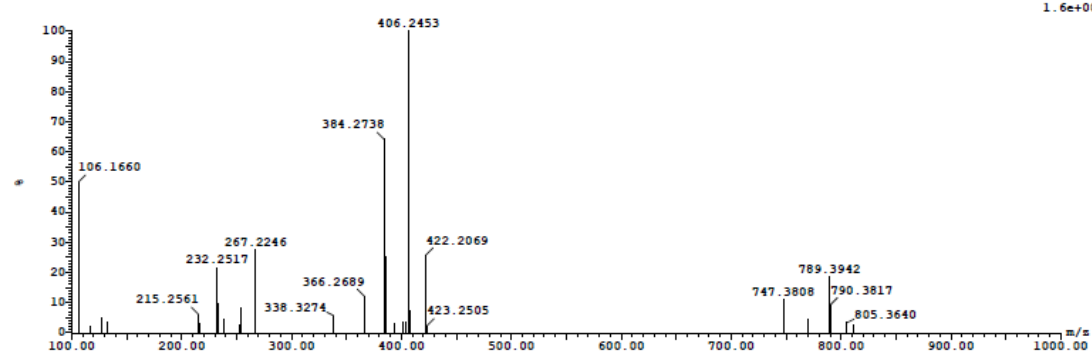

Peak ID Time Error PPM  
29 9.07  
(Time: 9.07)

1:MS ES+  
1.2e+007

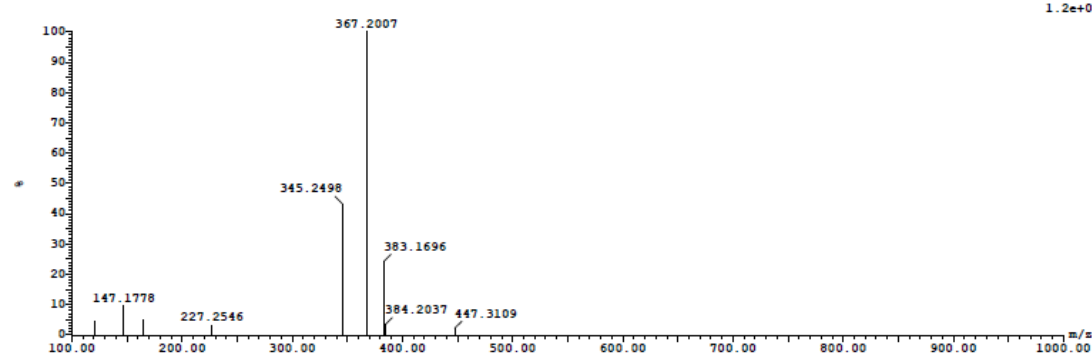

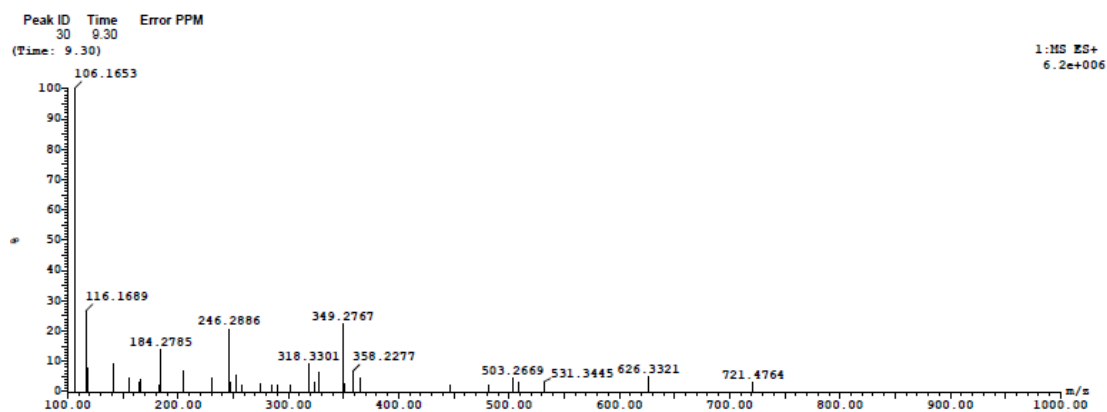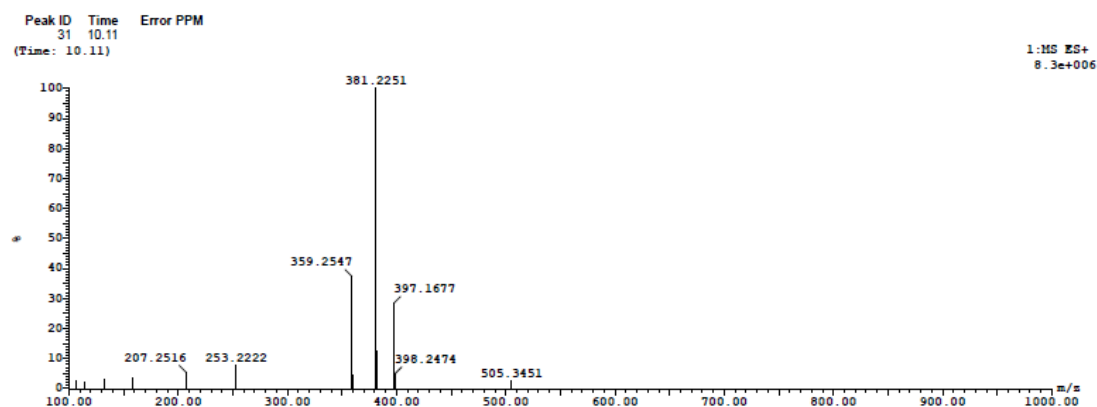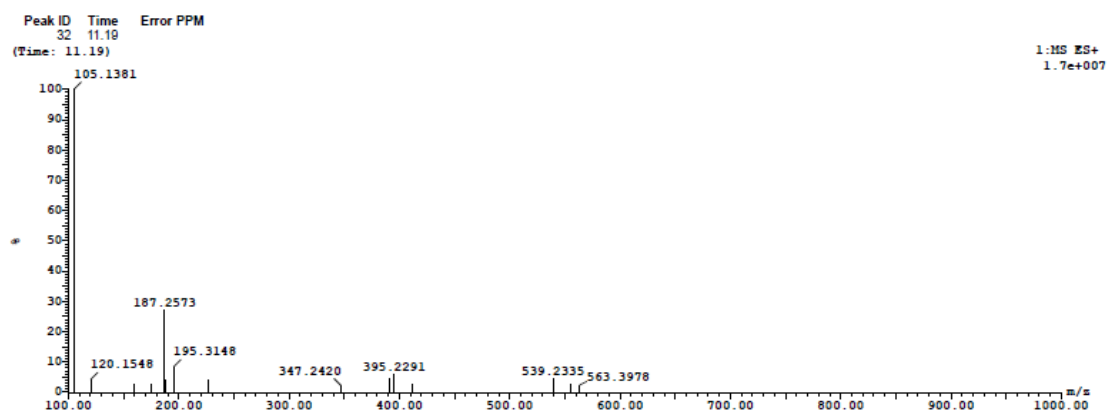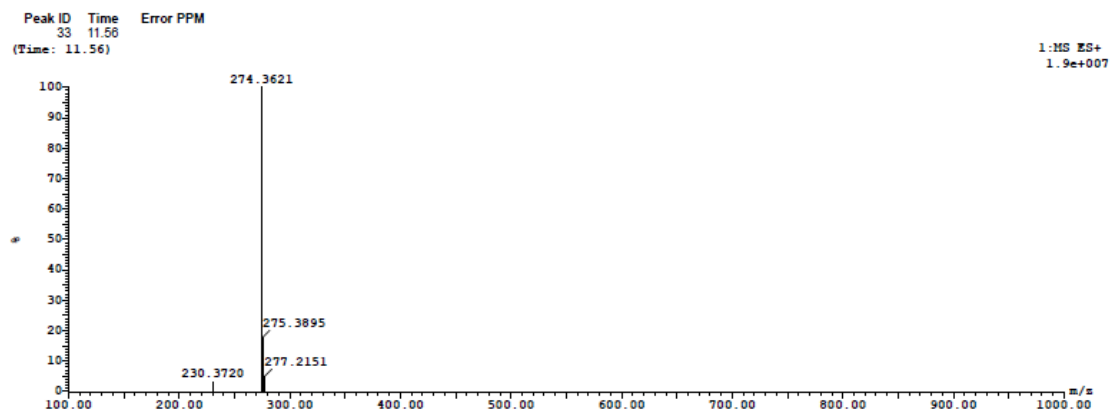

Peak ID Time Error PPM  
34 11.65  
(Time: 11.65)

1:MS ES+  
8.2e+006

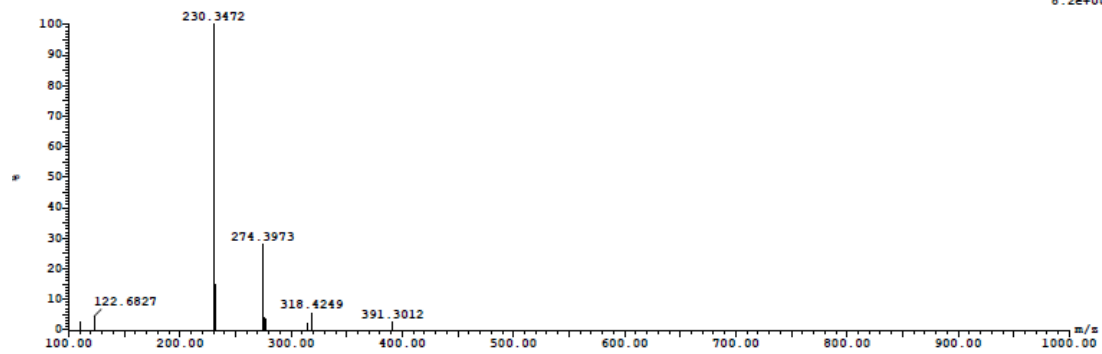

Peak ID Time Error PPM  
35 12.83  
(Time: 12.83)

1:MS ES+  
7.4e+006

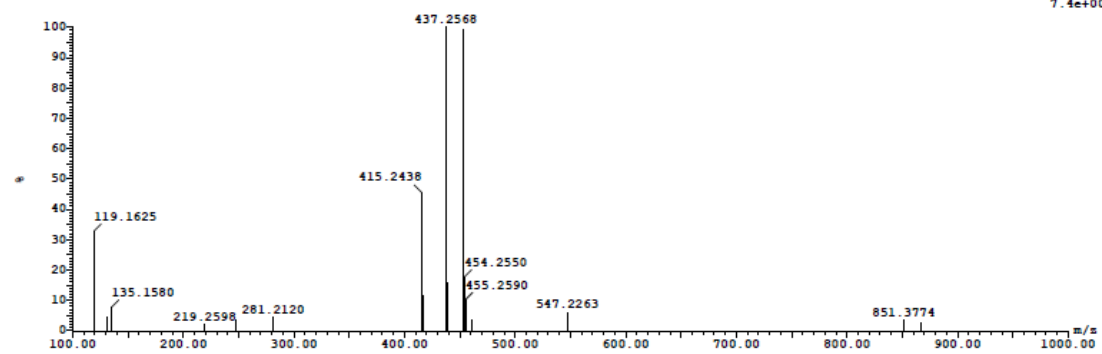

Peak ID Time Error PPM  
36 20.08  
(Time: 20.08)

1:MS ES+  
2.5e+007

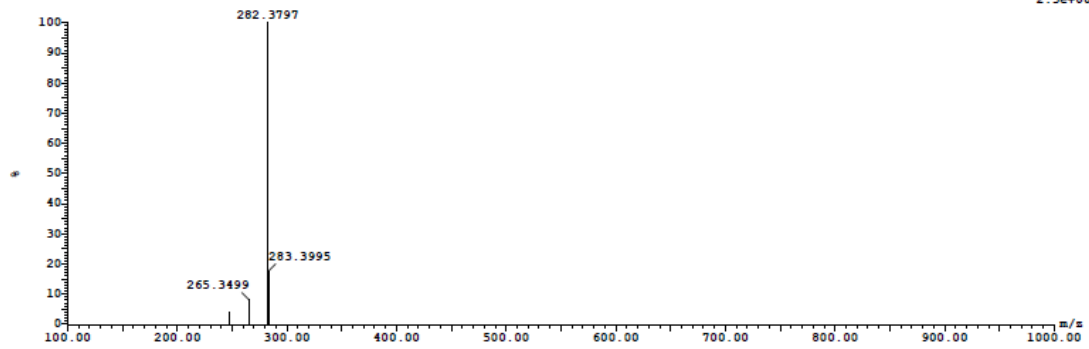

Peak ID Time Error PPM  
37 31.06  
(Time: 31.06)

1:MS ES+  
4.1e+007

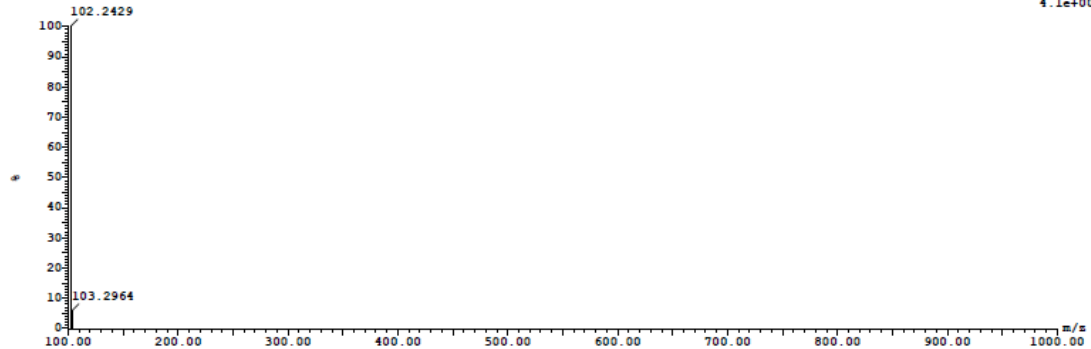

Peak ID Time Error PPM  
38 31.27  
(Time: 31.27)

1:MS ES+  
3.7e+007

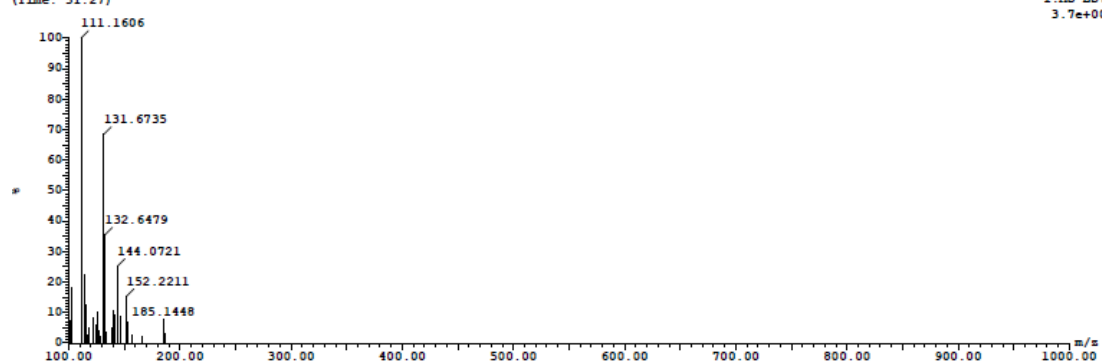

Peak ID Time Error PPM  
39 31.30  
(Time: 31.30)

1:MS ES+  
4.0e+007

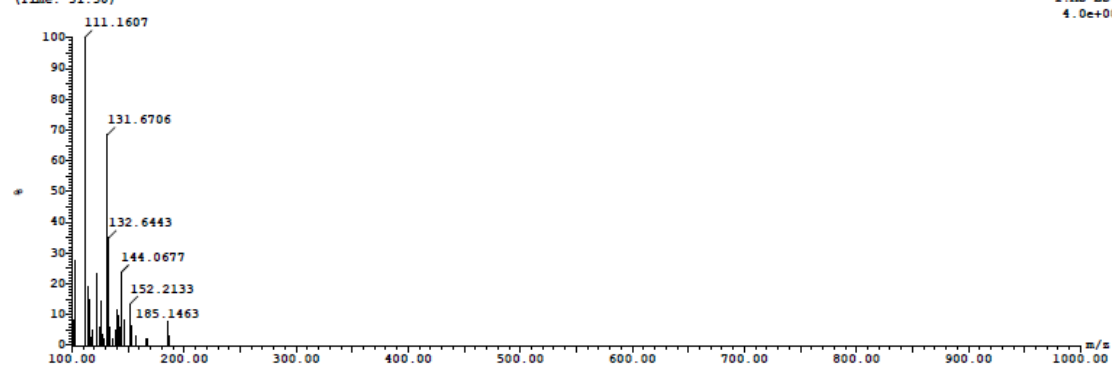

Peak ID Time Error PPM  
40 31.38  
(Time: 31.38)

1:MS ES+  
2.0e+007

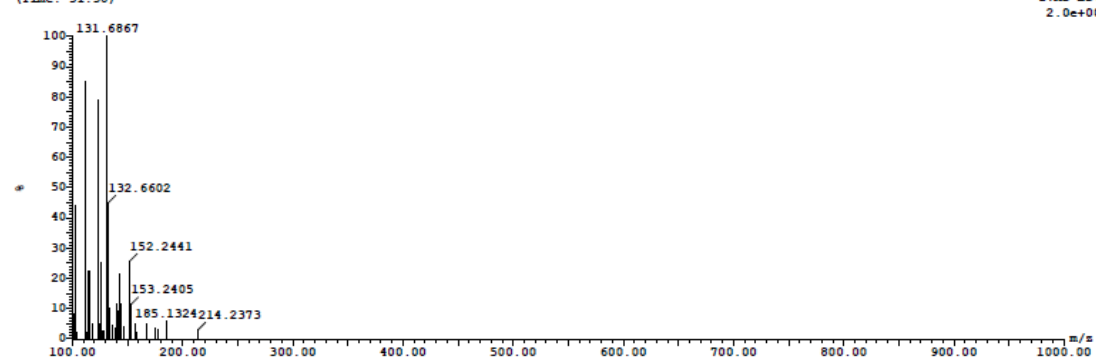



# Isolate SS19

1: MS ES+ :BPI

1.4e+008

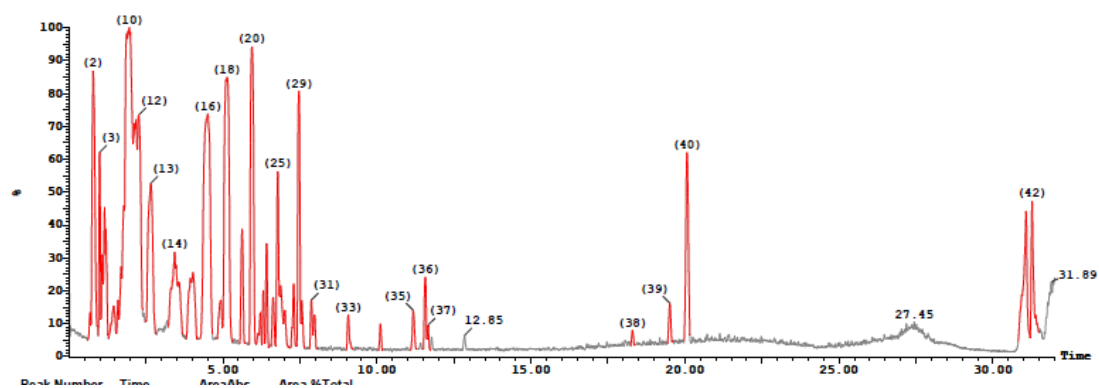

Peak ID Time Error PPM  
1 0.69  
(Time: 0.69)

1:MS ES+  
1.4e+007

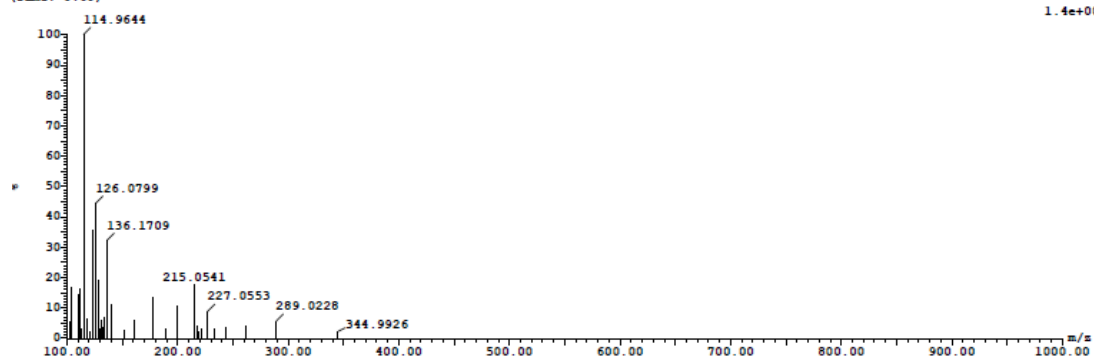

Peak ID Time Error PPM  
2 0.78  
(Time: 0.78)

1:MS ES+  
8.6e+007

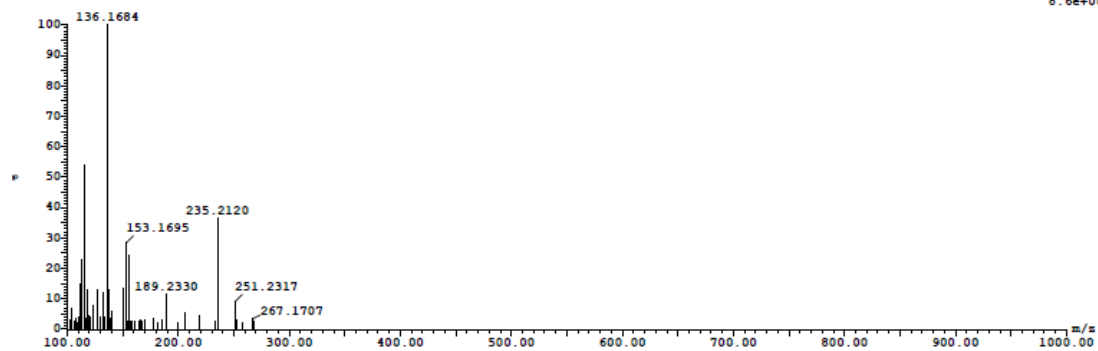

Peak ID Time Error PPM  
3 1.00  
(Time: 1.00)

1:MS ES+  
3.9e+007

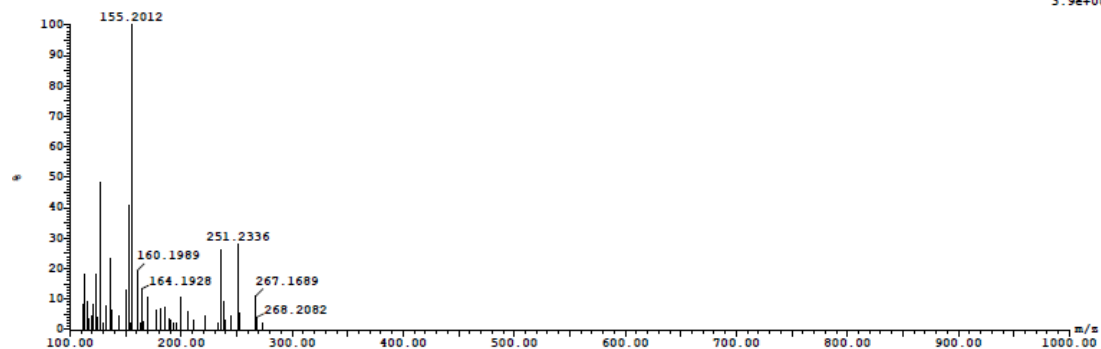

Peak ID Time Error PPM  
4 1.08  
(Time: 1.08)

1:MS ES+  
2.6e+007

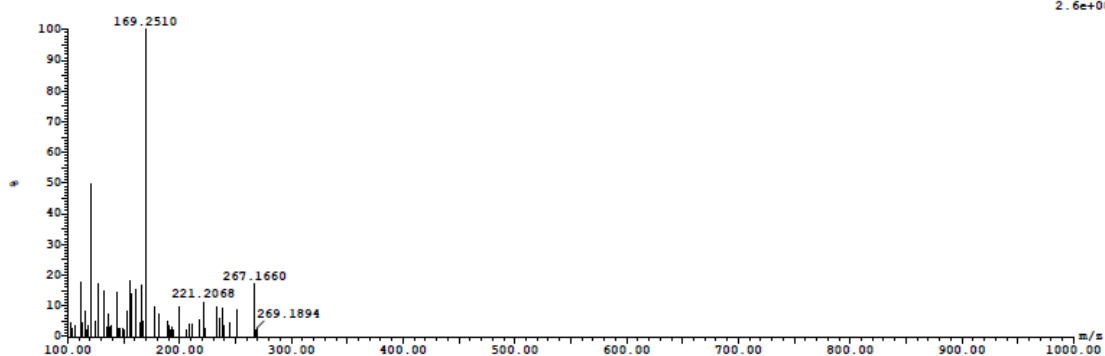

Peak ID Time Error PPM  
5 1.10  
(Time: 1.16)

1:MS ES+  
3.8e+007

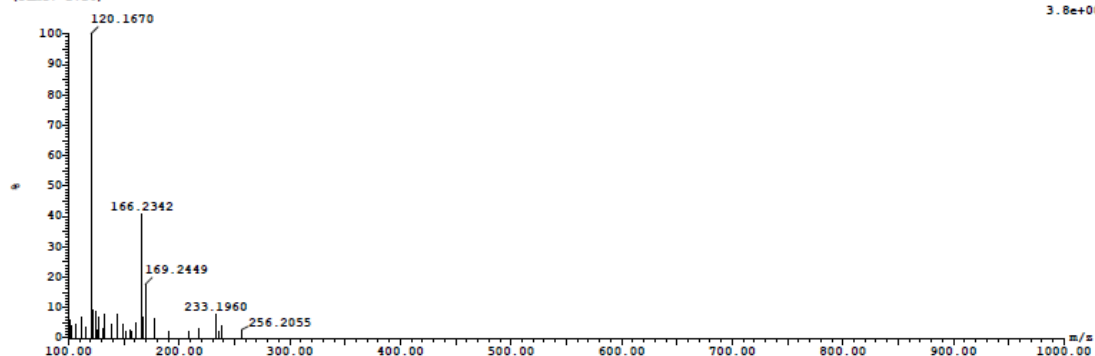

Peak ID Time Error PPM  
6 1.20  
(Time: 1.20)

1:MS ES+  
3.5e+007

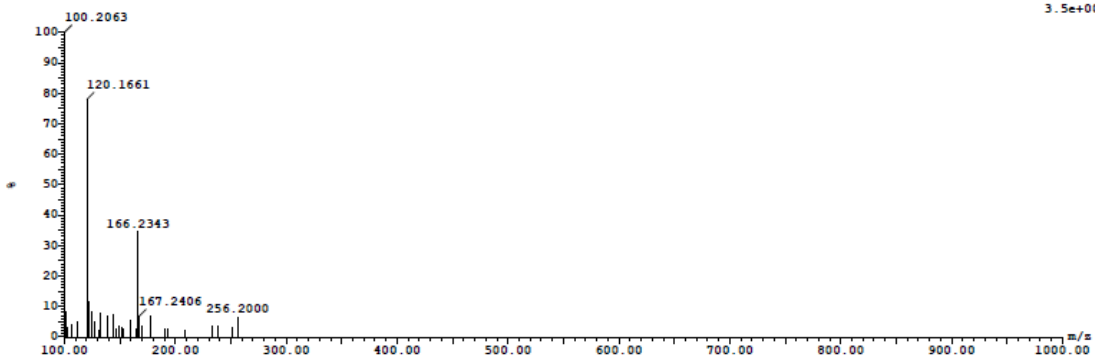

Peak ID Time Error PPM  
7 1.46  
(Time: 1.46)

1:MS ES+  
1.7e+007

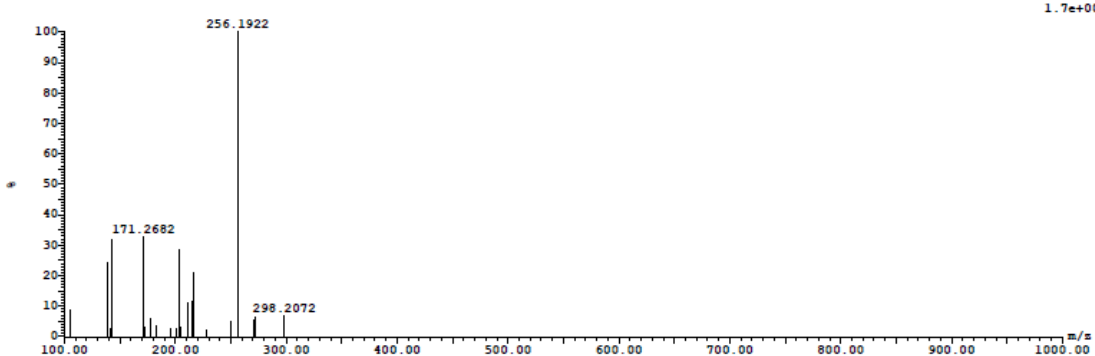

Peak ID Time Error PPM  
8 1.60

1:MS ES+  
1.6e+007

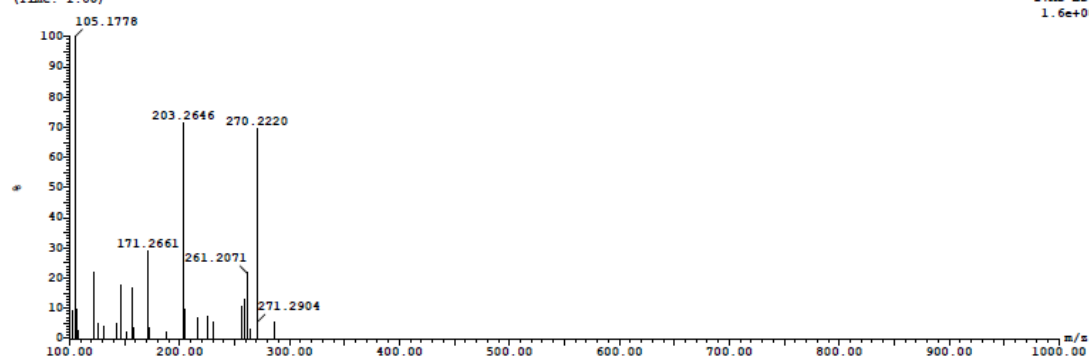

Peak ID Time Error PPM  
9 1.69

1:MS ES+  
2.8e+007

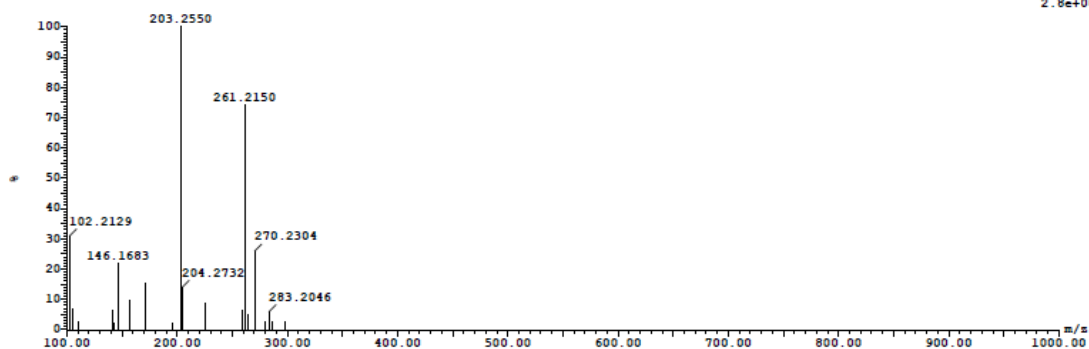

Peak ID Time Error PPM  
10 1.96

1:MS ES+  
1.3e+008

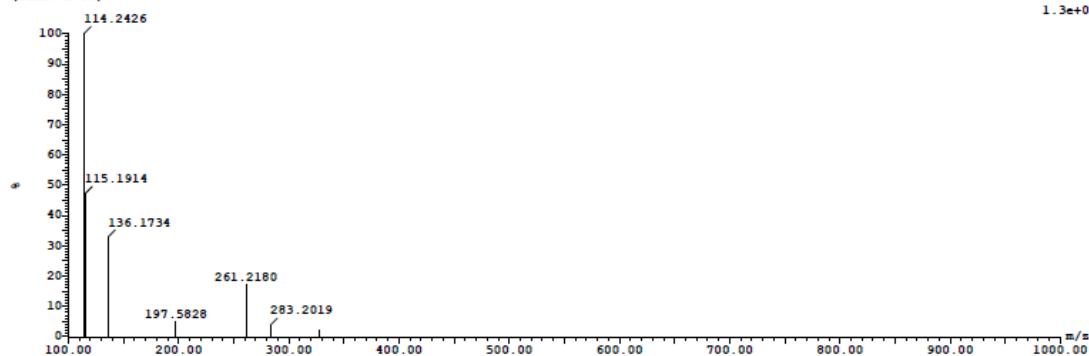

Peak ID Time Error PPM  
11 2.18

1:MS ES+  
9.1e+007

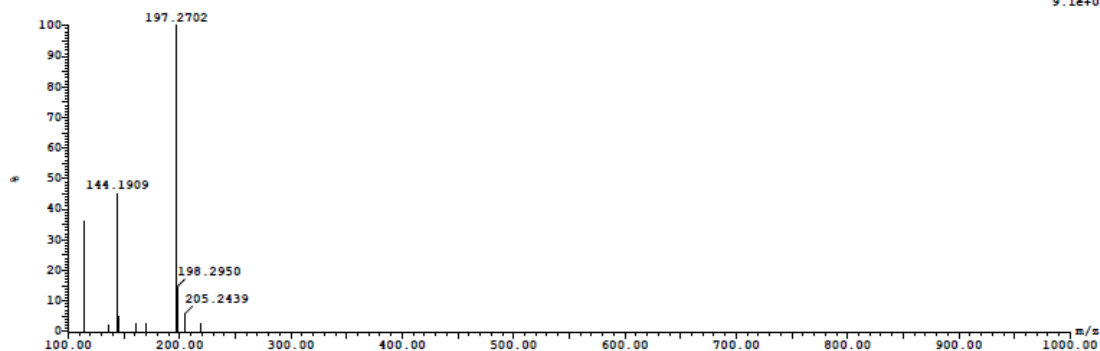

Peak ID Time Error PPM  
12 2.26  
(Time: 2.26)

1:MS ES+  
9.2e+007

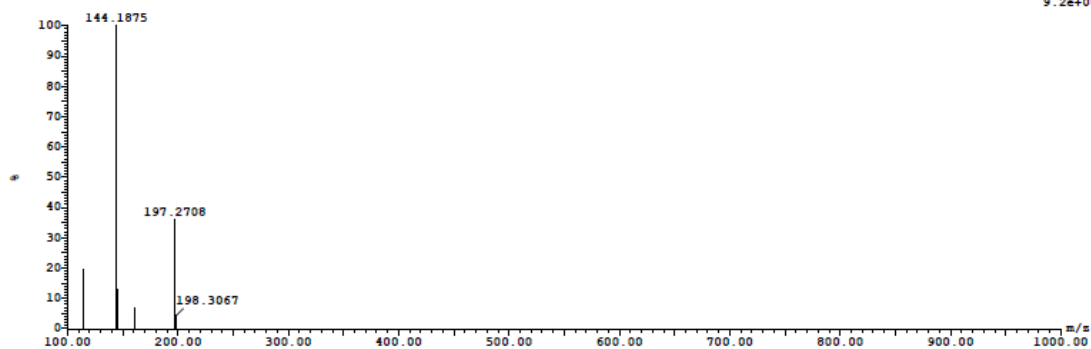

Peak ID Time Error PPM  
13 2.66  
(Time: 2.66)

1:MS ES+  
6.5e+007

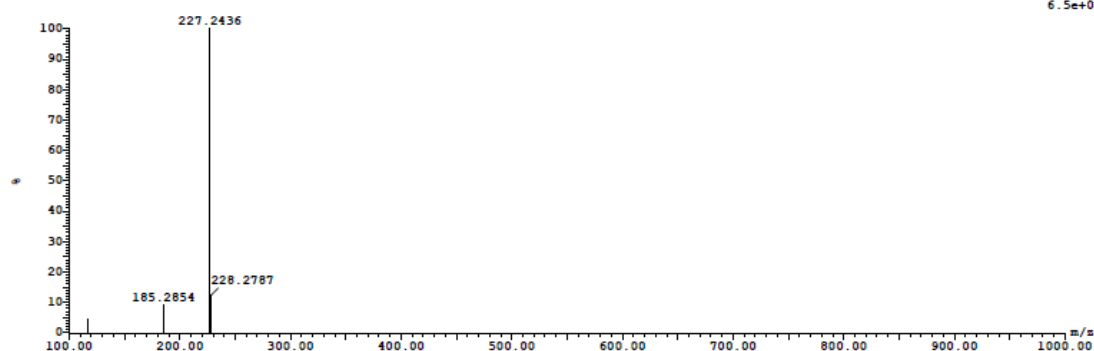

Peak ID Time Error PPM  
14 3.43  
(Time: 3.43)

1:MS ES+  
3.7e+007

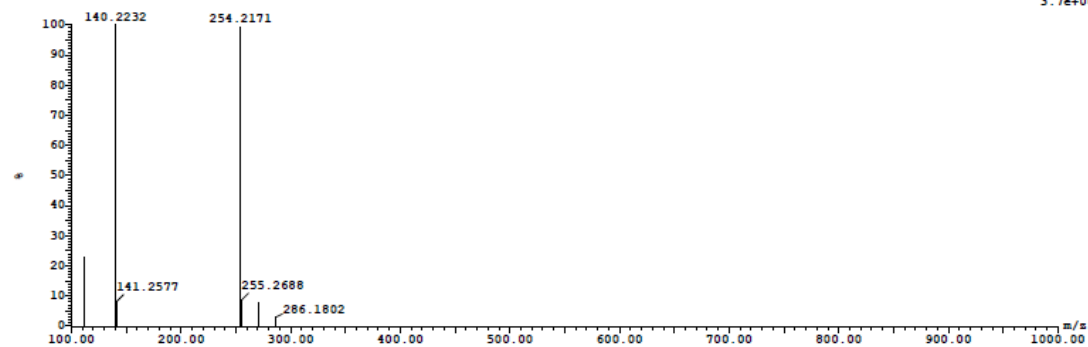

Peak ID Time Error PPM  
15 4.03  
(Time: 4.03)

1:MS ES+  
3.1e+007

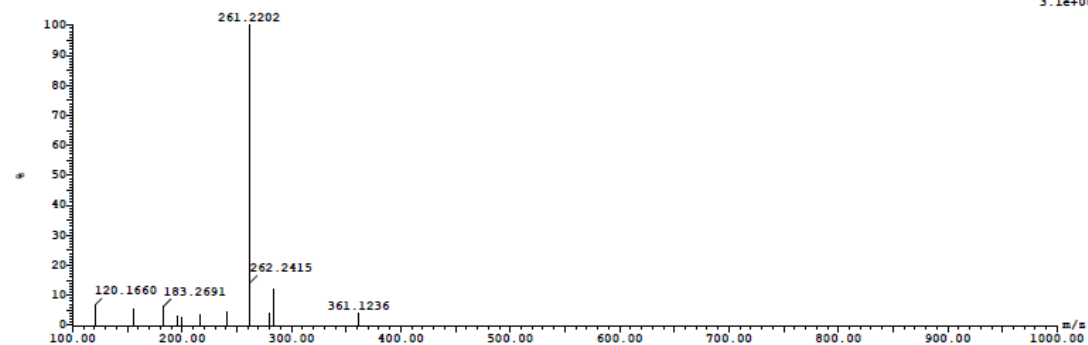

Peak ID Time Error PPM  
16 4.51  
(Time: 4.51)

1:MS ES+  
5.0e+007

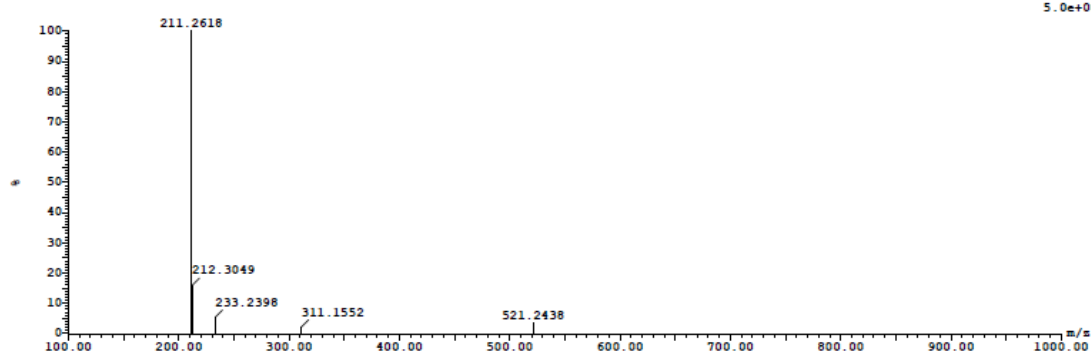

Peak ID Time Error PPM  
17 4.93  
(Time: 4.93)

1:MS ES+  
1.5e+007

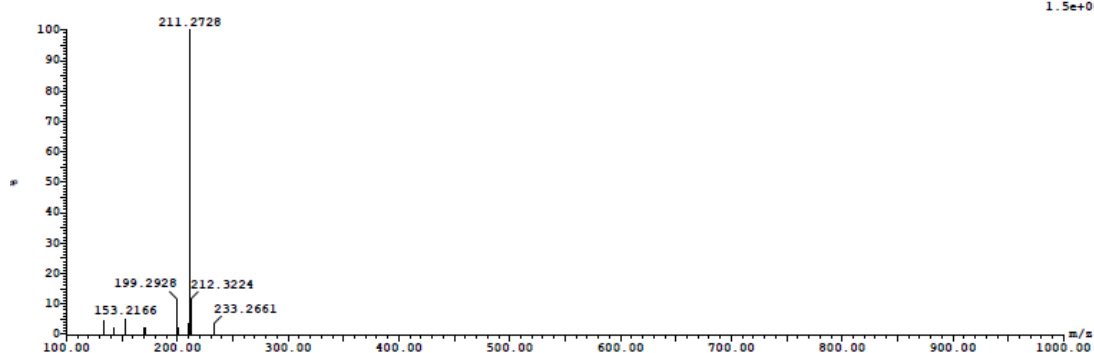

Peak ID Time Error PPM  
18 5.13  
(Time: 5.13)

1:MS ES+  
6.3e+007

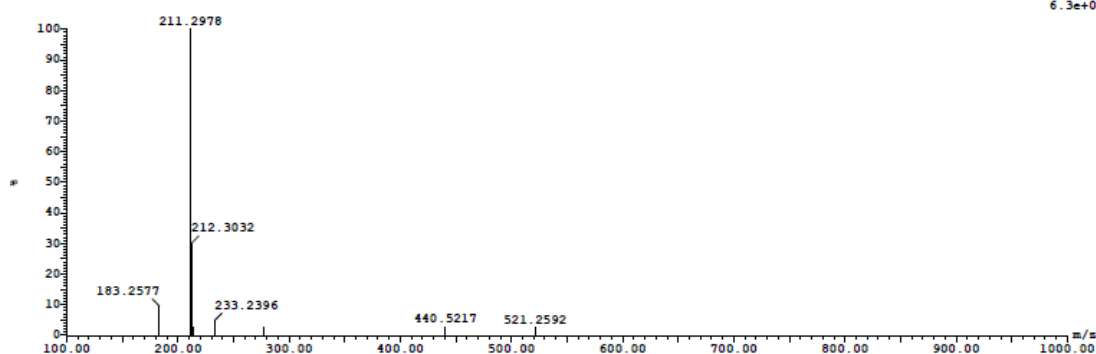

Peak ID Time Error PPM  
19 5.62  
(Time: 5.62)

1:MS ES+  
3.6e+007

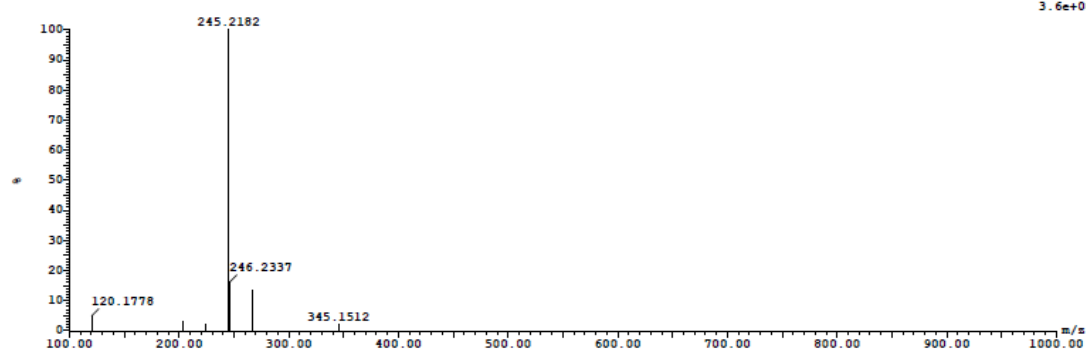

Peak ID Time Error PPM  
20 5.94  
(Time: 5.94)

1:MS ES+  
1.2e+008

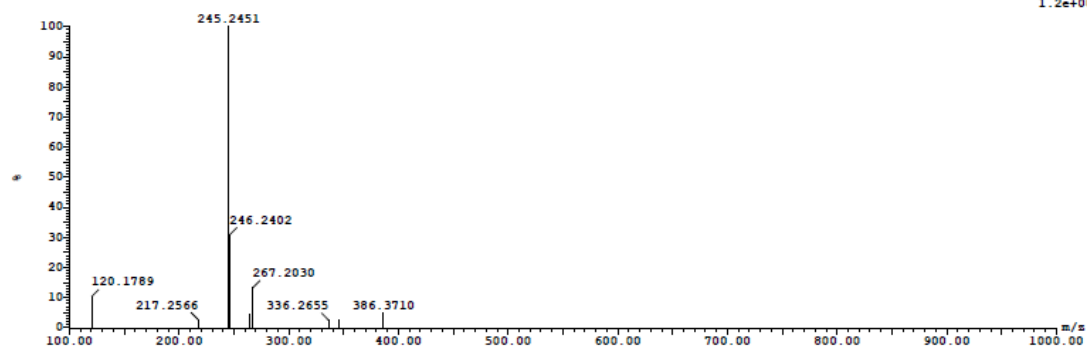

Peak ID Time Error PPM  
21 6.21  
(Time: 6.21)

1:MS ES+  
1.0e+007

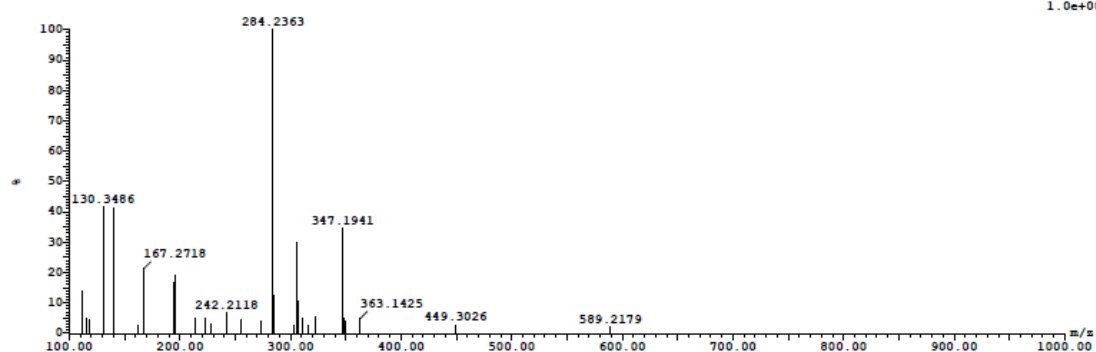

Peak ID Time Error PPM  
22 6.31  
(Time: 6.31)

1:MS ES+  
1.5e+007

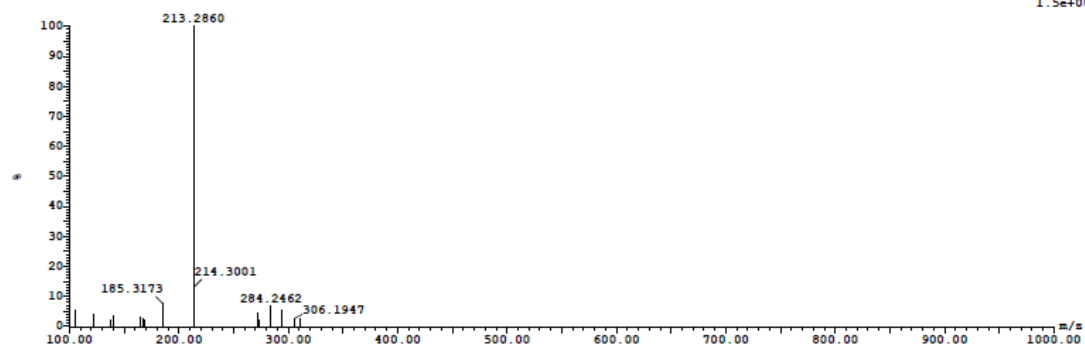

Peak ID Time Error PPM  
23 6.42  
(Time: 6.42)

1:MS ES+  
2.7e+007

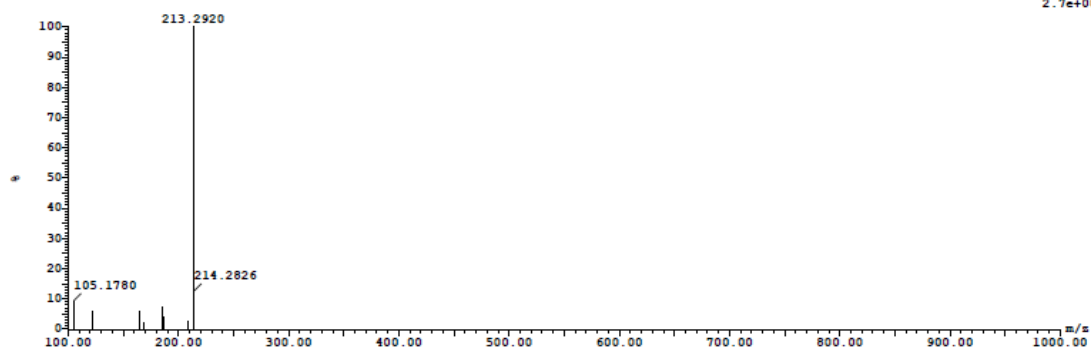

Peak ID Time Error PPM  
24 6.63  
(Time: 6.63)

1:MS ES+  
1.7e+007

Probable metabolite: Bacillcoumacin G

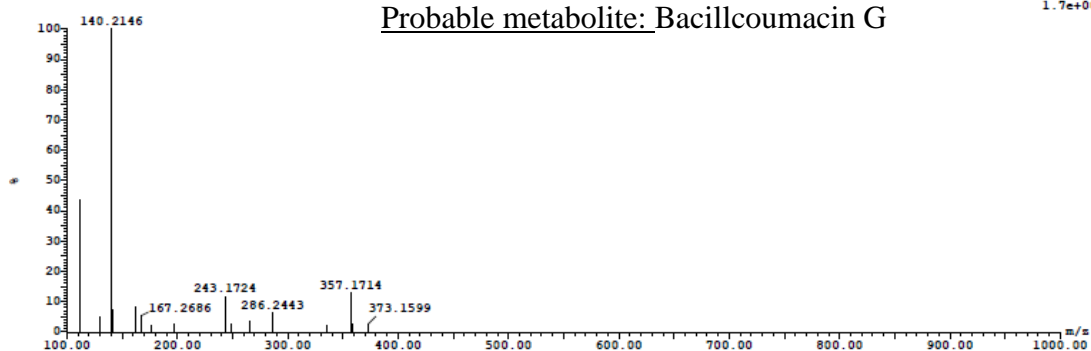

Peak ID Time Error PPM  
25 6.78  
(Time: 6.78)

1:MS ES+  
4.9e+007

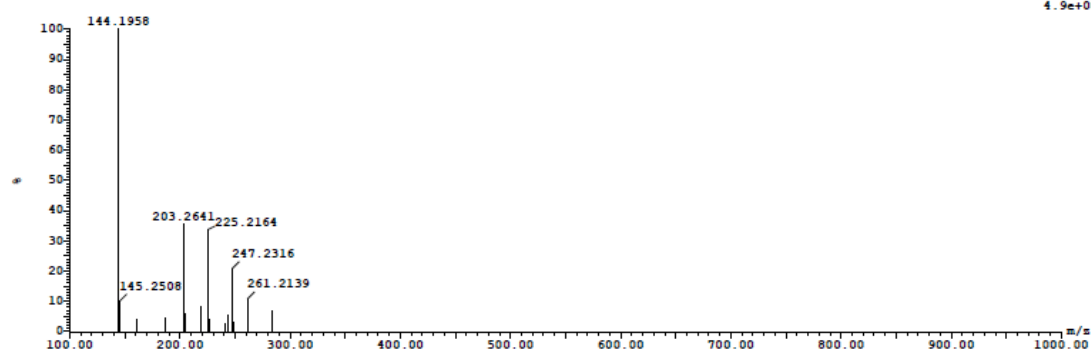

Peak ID Time Error PPM  
26 6.87  
(Time: 6.87)

1:MS ES+  
2.5e+007

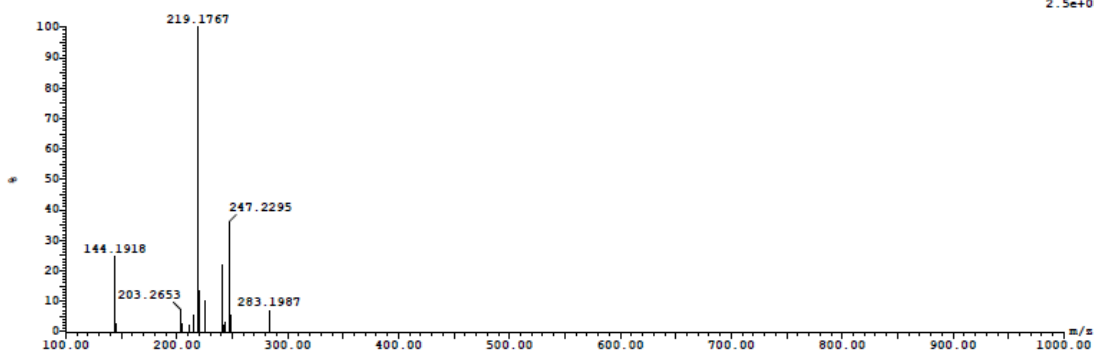

Peak ID Time Error PPM  
27 7.01  
(Time: 7.01)

1:MS ES+  
1.5e+007

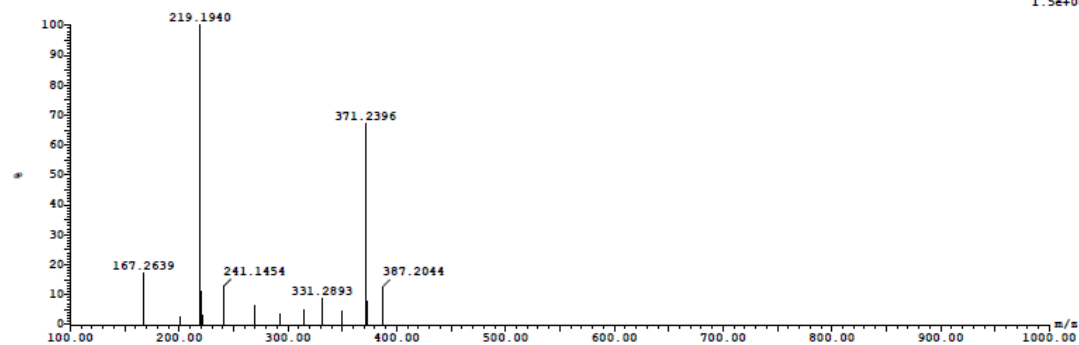

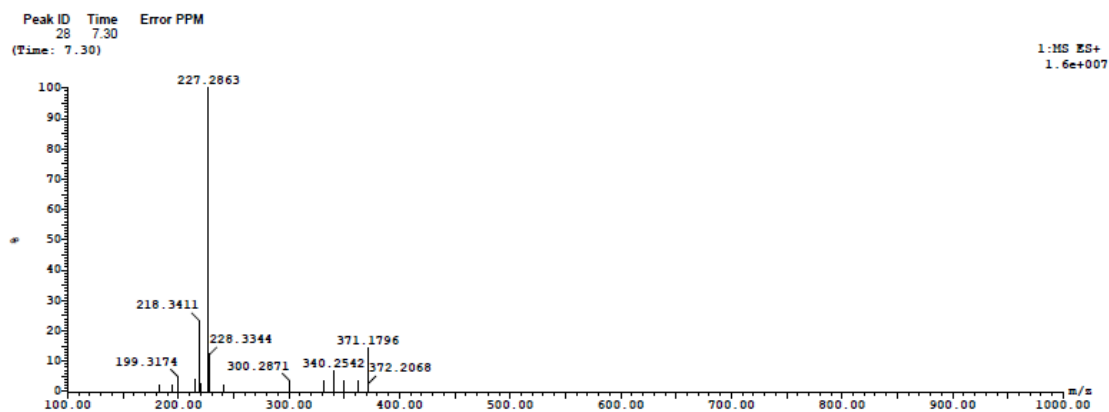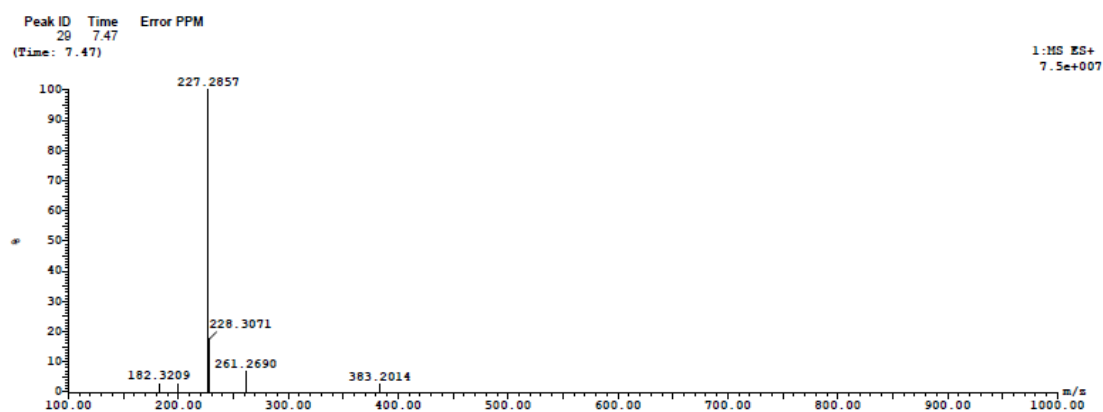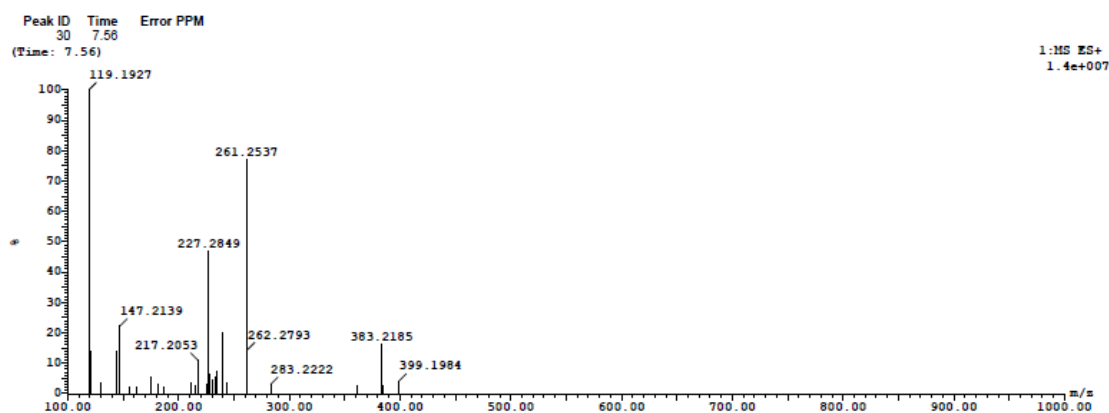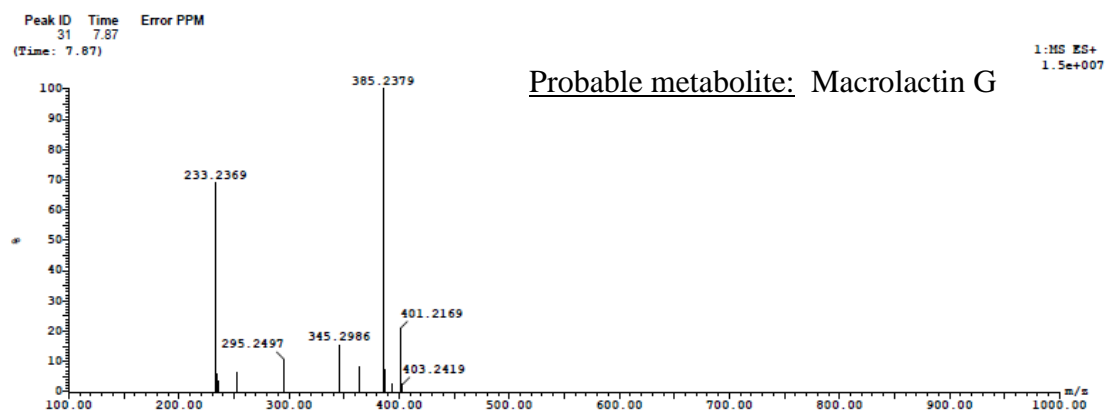



Peak ID Time Error PPM  
32 7.98  
(Time: 7.98)

1:MS ES+  
1.2e+007

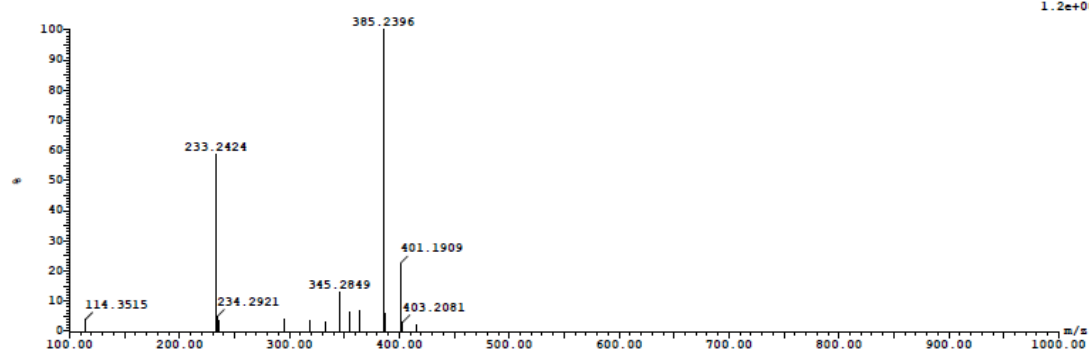

Peak ID Time Error PPM  
33 9.07  
(Time: 9.07)

1:MS ES+  
1.1e+007

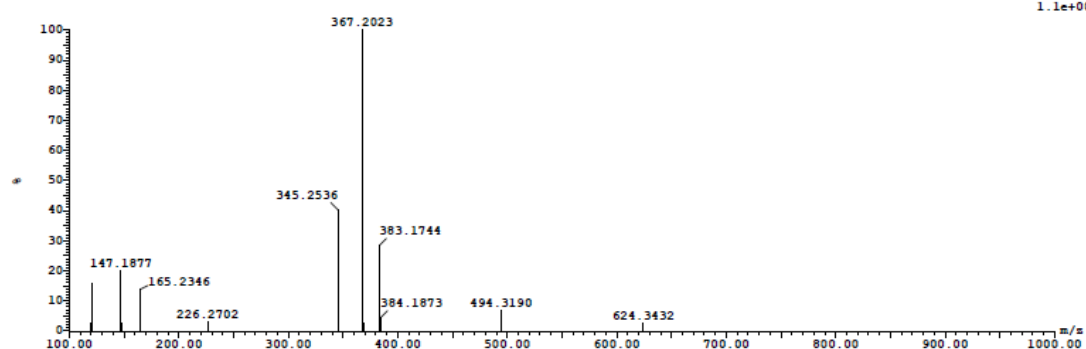

Peak ID Time Error PPM  
34 10.11  
(Time: 10.11)

1:MS ES+  
8.0e+006

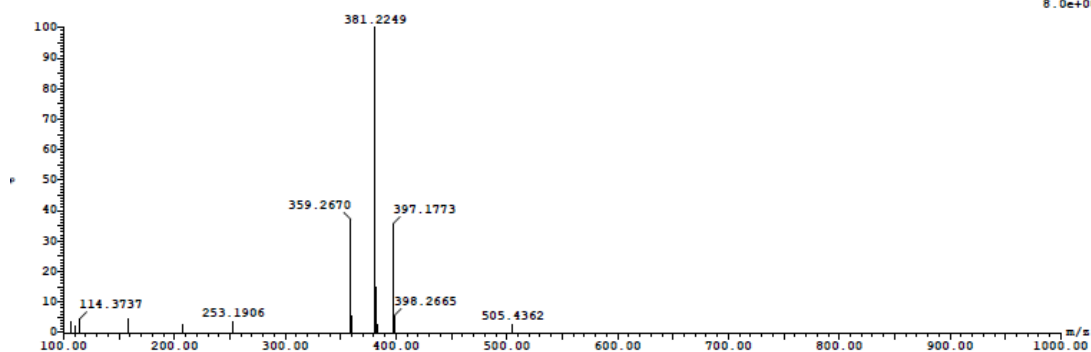

Peak ID Time Error PPM  
35 11.18  
(Time: 11.18)

1:MS ES+  
1.4e+007

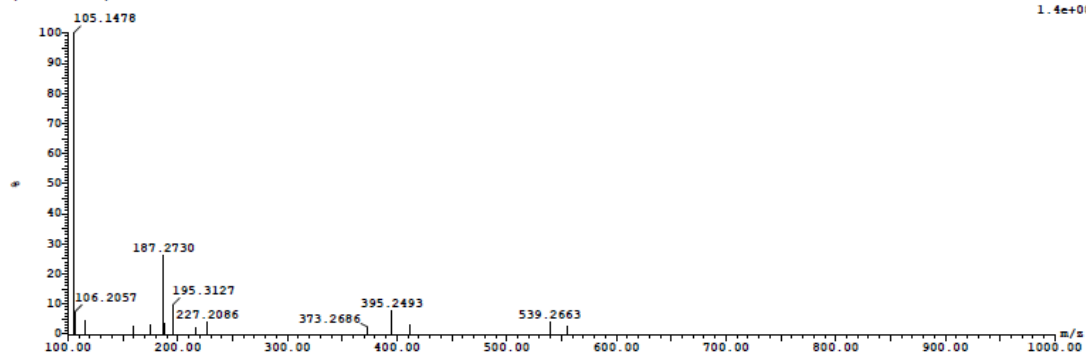

Peak ID Time Error PPM  
36 11.57  
(Time: 11.57)

1:MS ES+  
2.1e+007

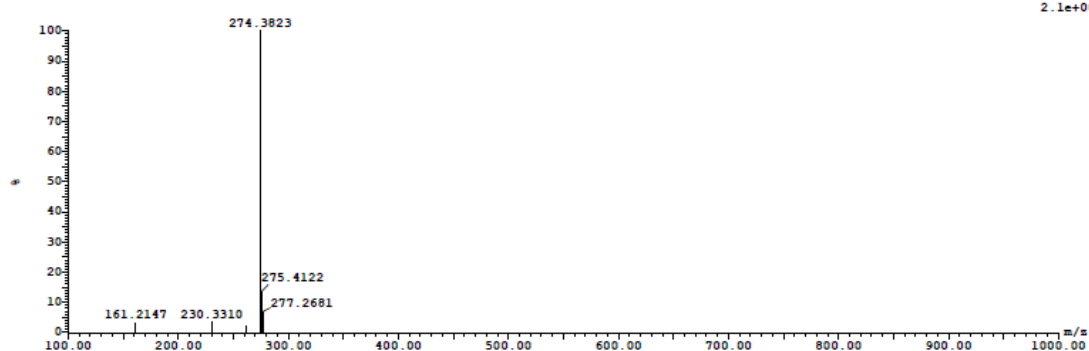

Peak ID Time Error PPM  
37 11.65  
(Time: 11.65)

1:MS ES+  
7.7e+006

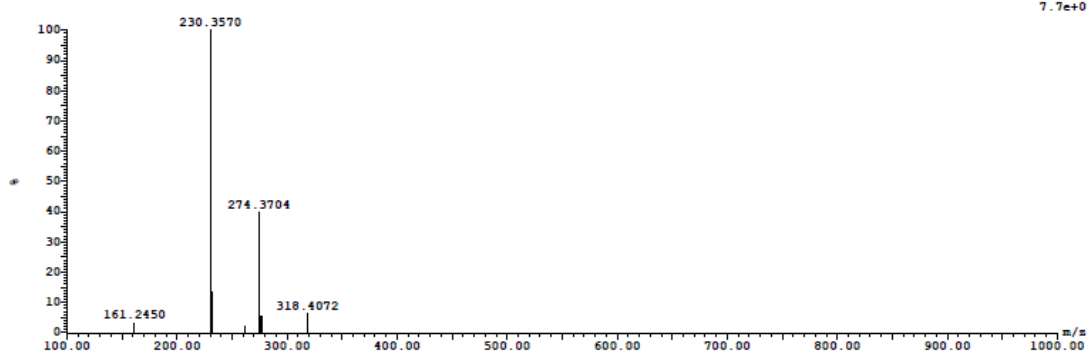

Peak ID Time Error PPM  
38 18.29  
(Time: 18.29)

1:MS ES+  
7.8e+006

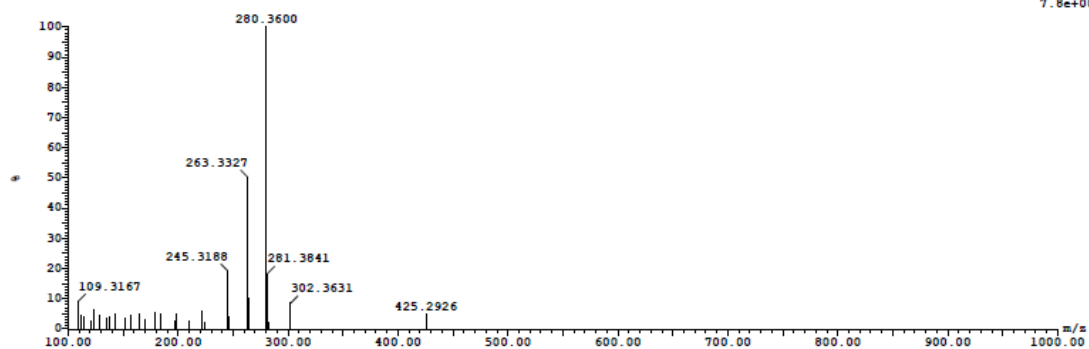

Peak ID Time Error PPM  
39 19.51  
(Time: 19.51)

1:MS ES+  
1.6e+007

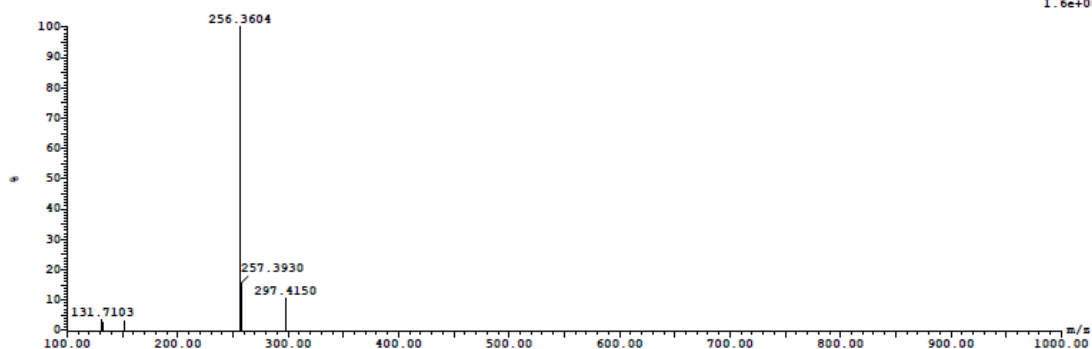

Peak ID Time Error PPM  
40 20.07  
(Time: 20.07)

1:MS ES+  
6.6e+007

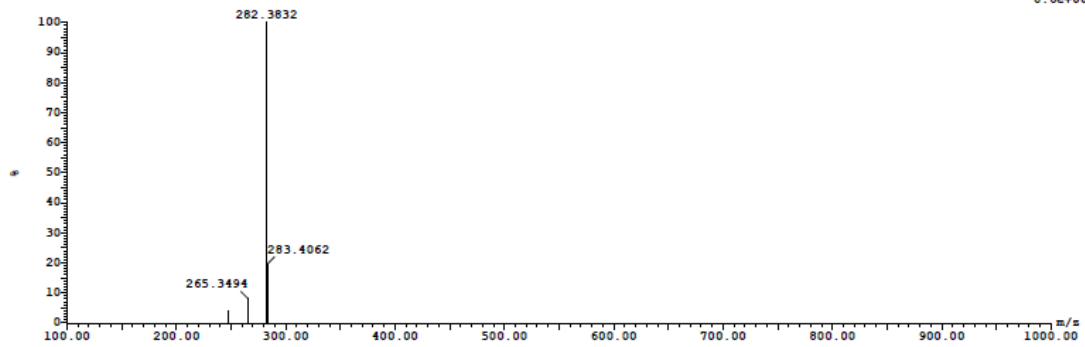

Peak ID Time Error PPM  
41 31.07  
(Time: 31.07)

1:MS ES+  
4.2e+007

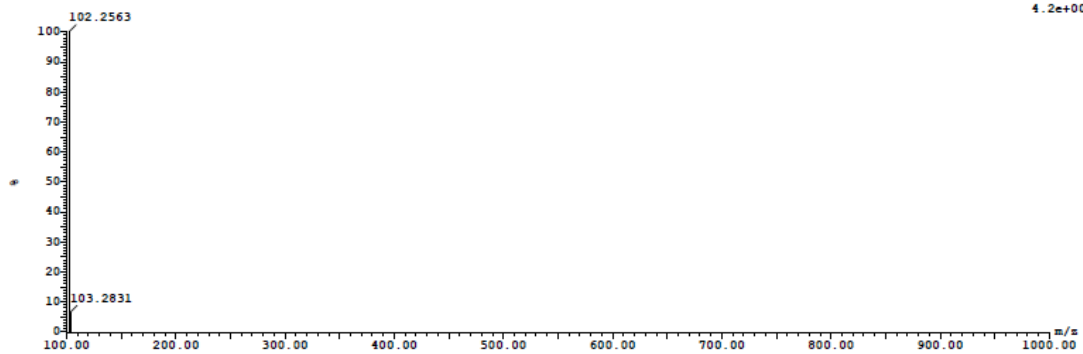

Peak ID Time Error PPM  
42 31.27  
(Time: 31.27)

1:MS ES+  
3.8e+007

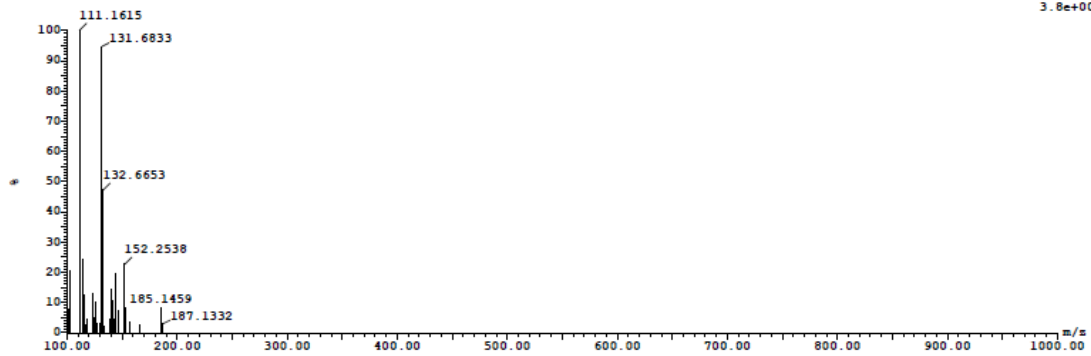

Peak ID Time Error PPM  
43 31.39  
(Time: 31.39)

1:MS ES+  
1.4e+007

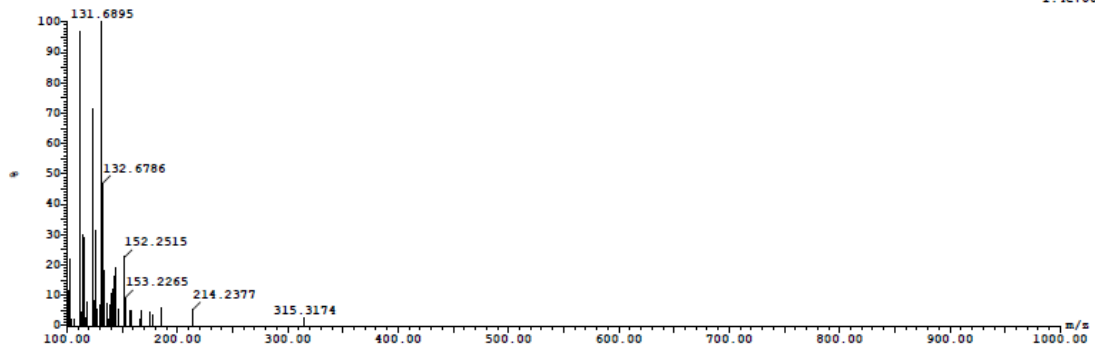

Supplement: s1 [file s1]
